# Self-confined expression in the *Arabidopsis* root stem cell niche

Josep Mercadal<sup>1,2</sup>, Isabel Betegón-Putze<sup>3</sup>, Nadja Bosch<sup>3</sup>, Ana I. Caño-Delgado<sup>3</sup>,  
and Marta Ibañes<sup>1,2,\*</sup>

<sup>1</sup>Departament de Física de la Matèria Condensada, Facultat de Física, Universitat de Barcelona, 08028  
Barcelona, Spain.

<sup>2</sup>Universitat de Barcelona Institute of Complex Systems (UBICS), 08028 Barcelona, Spain.

<sup>3</sup>Department of Molecular Genetics, Centre for Research in Agricultural Genomics (CRAG),  
CSIC-IRTA-UAB-UB, Campus UAB (Cerdanyola del Vallès), Barcelona, Spain

\*For correspondence: miban@ub.edu

## Abstract

Stem cell niches are local microenvironments that preserve their unique identity while communicating with adjacent tissues. In the primary root of *Arabidopsis thaliana*, the stem cell niche comprises the expression of two transcription factors, BRAVO and WOXS, among others. Intriguingly, these proteins confine their own gene expression to the niche, as evidenced in each mutant background. Here we propose through mathematical modeling that BRAVO confines its own expression domain to the stem cell niche by attenuating its WOXS-dependent diffusible activator. This negative feedback drives WOXS action to be spatially restricted as well. The results show that WOXS diffusion and sequestration by binding to BRAVO is sufficient to drive realistic confined BRAVO expression at the stem cell niche. We propose that attenuation of a diffusible activator can be a general mechanism to confine genetic activity to a small region while at the same time maintain signaling within it and with the surrounding cells.

## 1 Introduction

Both in animals and plants, stem cells are maintained in tightly regulated microenvironments called stem cell niches (SCNs). Within these SCNs, stem cells remain in an undifferentiated state and provide a continuous flux of precursors of more specialized cells that sustain growth and replace old or damaged tissues [1]. SCNs usually consist on a few number of stem cells maintained by short-range signals produced by localized sources or *organizing centers*, groups of cells which maintain neighboring cells in a stem cell state [2, 3]. As stem cell daughters are placed outside the reach of these signals, they begin to differentiate and give rise to more specialized cell types [4]. In animals, common signals preserving stem cells are diffusible ligands like the *Dpp* morphogen for *Drosophila* male or female germ cells [5, 6] and *Hedgehog* in mouse and *Drosophila* epithelial cells [7, 8], to name a few. Overproduction of these signals can drive an increase in the number of stem cells within the tissue, resulting in enlarged niches and often leading to malfunctioning of the surrounding tissue, or even whole organs [3]. Knowing the origin and function of these signals is therefore essential to understand the role of stem cells in the processes underlying organism development and sustenance.

37 In the model plant *Arabidopsis thaliana*, highly mobile hormones, such as auxin [9, 10, 11], as well as  
38 short-range moving transcription factors like *WUSCHEL* and *WOX5* (*WUSCHEL-RELATED HOME-*  
39 *OBOX 5*) [12, 13] are involved in specifying stem cell niches. In the root apical meristem of *Arabidop-*  
40 *sis*, the SCN lies at the tip of the root, a location known to be established by positional information  
41 conferred by auxin signaling [14, 15]. In particular, the root SCN is specified by the overlapping of the  
42 *SCARECROW* (*SCR*) and *SHORTROOT* (*SHR*) transcription factors, together with the activation of  
43 *PLETHORA* (*PLT*) genes by the hormone auxin, whose levels peak at the position where the SCN is  
44 established [16]. This positional signaling allows for the necessary plasticity to establish a new niche  
45 when it has been destroyed or damaged, by virtue of a continual supply and renewal of stem cells at  
46 the very same location [17].

47 The root SCN is dynamically specified by the constant balance between external signaling and local  
48 communication, restricting the location of stem cells to a small, well-defined region. The SCN is  
49 formed by a small group of rarely dividing pluripotent cells called the quiescent center (*QC*) and  
50 by immediately surrounding stem cells, i.e. the vascular initials (*VI*), columella stem cells (*CSC*)  
51 and cortex-endodermis initials (*CEI*) (Figure 1A)[18]. Direct cell-cell contact from the *QC* to its  
52 surrounding stem cells is important for stem cell identity [19, 20] and can involve the transport of short-  
53 range signals from the *QC*. The homeodomain transcription factor *WOX5* is specifically expressed at  
54 the *QC* [13] and is able to move towards adjacent cells [21, 22, 23]. *WOX5* itself has been proposed  
55 to act as the long-sought short-range signal to repress columella stem cell differentiation [21], albeit  
56 recent results challenge this view [22]. While short-range signaling is thought to ensure that stem cell  
57 numbers are restrained and the SCN does not become displaced from the growing root tip, it is yet  
58 unclear how this is achieved [24, 25, 26].

59 The R2R3-MYB transcription factor *BRAVO* (*BRASSINOSTEROIDS AT VASCULAR AND OR-*  
60 *GANIZING CENTER*) has recently been linked to the maintenance of SCN homeostasis [27, 28].  
61 *BRAVO* is expressed at the *QC* and vascular initials [27], and colocalizes with *WOX5* in the *QC* [28].  
62 Both *BRAVO* and *WOX5* have been shown to individually promote quiescence, as mutant roots with  
63 disrupted *BRAVO* or *WOX5* exhibit increased *QC* divisions, supporting their role as essential factors  
64 for *QC* homeostasis [27, 29]. We have recently shown that *BRAVO* and *WOX5* are codependent, as  
65 evidenced by the mutual regulation of each other promoter expression and the physical interaction  
66 of their corresponding proteins, presumably into a protein (e.g. heterodimer) complex [28]. These  
67 data also showed that the expression of the *BRAVO* promoter, restricted to the *QC* and *VI* in WT  
68 plants, expands towards the vasculature, cortex and endodermis in the *bravo* loss-of-function mutant  
69 [28] (Figure 1B,C), suggesting that *BRAVO* actively confines its own expression domain. Moreover,  
70 this expansion is not observed in the loss-of-function *wox5* mutant nor in the double loss-of-function  
71 mutant *bravo wox5* [28] (Figure 1D,E), pointing to a mechanism for self-confinement that is strongly  
72 *WOX5*-dependent. How this active confinement is achieved remains to be elucidated.

73 In this paper we show, through mathematical and computational analysis, that the spatial confinement  
74 of *BRAVO* expression can result from a negative feedback through a mobile activator, which might  
75 be *WOX5* or a target thereof. This mechanism also reduces the spatial domain of *WOX5* activity,  
76 overall providing a natural way for stem-specific factors to locally regulate SCN maintenance. We test  
77 different scenarios for the interactions between *BRAVO* and its activator, and study the implications  
78 and plausibility of each of them to explain the changes in expression observed experimentally. Our  
79 results support that the small diffusion of *WOX5* [21, 22, 23], together with its physical interaction  
80 with *BRAVO* [28], can explain the confined nature of *BRAVO* expression. Additional interactions,  
81 which involve *BRAVO* and *WOX5* regulating common targets in an antagonistic manner, and are  
82 supported by transcriptomic data on the *QC* [28], can act redundantly, but are required when *WOX5*  
83 targets diffuse. Altogether, our results shed light on the regulatory principles balancing the confinement

84 of transcription factors to a microenvironment and their communication with the surrounding cells.

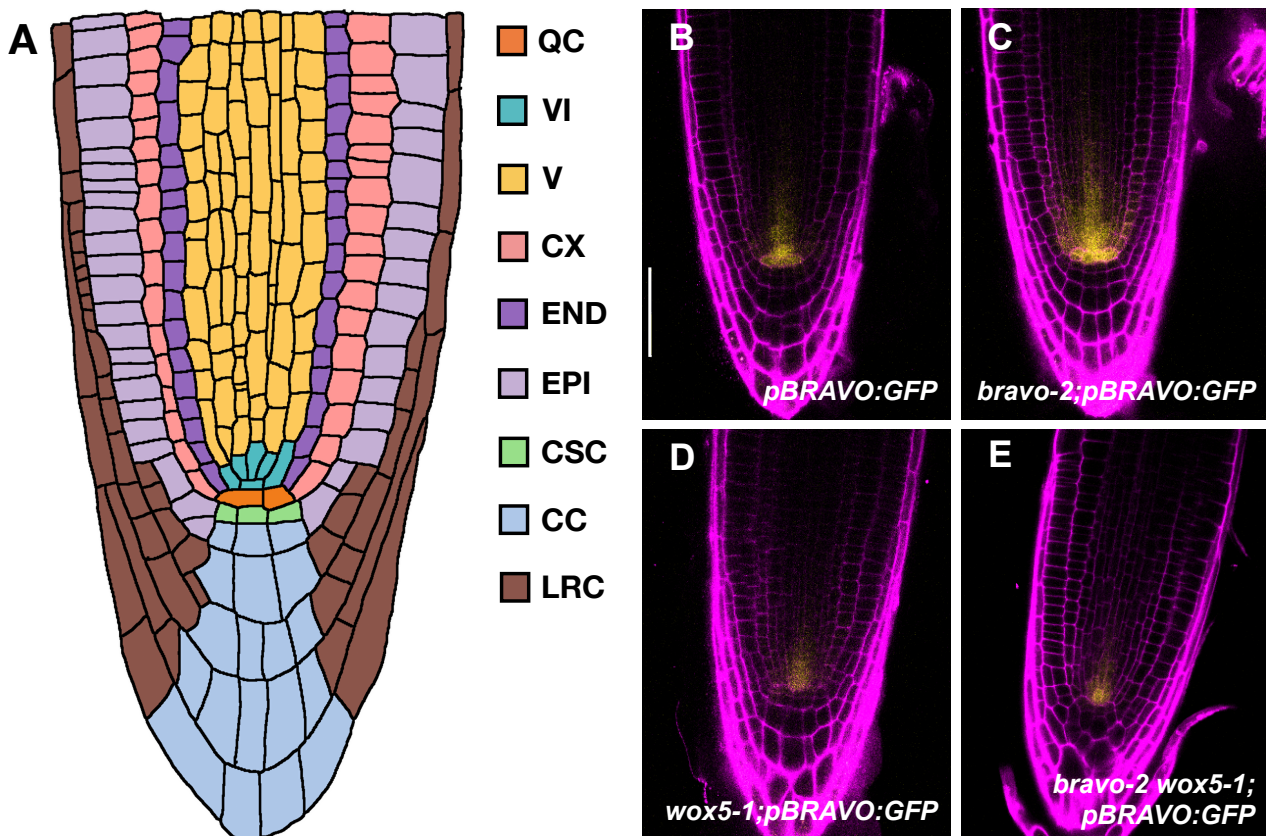

**Figure 1: *pBRAVO-GFP* activity in WT and in loss of function mutants.** A) Cartoon of the root apical meristem depicting its organization in cell-types: quiescent center (QC), vascular initials (V), vascular cells (V), cortex (CX), endodermis (END), epidermis (EPI), columella stem cells (CSC), columella cells (CC), lateral root cap (LRC). **B-E)** Confocal images of PI-stained 6-day-old roots. GFP-tagged expression is shown in yellow. Activity of the BRAVO promoter in WT (B), *bravo-2* (C), *wox5-1* (D) and *bravo-2 wox5-1* (E) loss-of-function backgrounds. Scale bar: 50 $\mu$ m. The promoter activity of BRAVO expands its domain in the *bravo-2* mutant. This suggests that BRAVO confines its own expression to the QC and VI in the WT. The expansion is not observed in *wox5-1* mutants nor in *bravo-2 wox5-1* mutants, suggesting that such confinement requires WOX5. B-E from experiments in [28].

## 85 2 Results

### 86 2.1 BRAVO can confine its own expression domain by immobilizing WOX5

87 The changes in the expression of *BRAVO* in the WT and in loss of function mutants of *BRAVO* and/or  
88 *WOX5* [28](Figure 1B-E) suggest that, in the WT, *BRAVO* confines its own expression to the SCN  
89 and that this occurs through a mechanism that requires *WOX5*. To decipher how this self-confinement  
90 can be attained, we first took into account that *BRAVO* transcription is ultimately activated by *WOX5*  
91 (either directly or through *WOX5*-targets) [28] and that *WOX5* proteins are able to move from the QC  
92 to the VI [22, 23]. Thus, *WOX5*, by moving to the VI cells and shootwards, is able to induce *BRAVO*  
93 expression in those cells. Additionally, we considered that *BRAVO* and *WOX5* are able to physically  
94 interact at the protein level, presumably by binding together, as suggested by Co-IP and FRET-FLIM  
95 analysis [28].

96 While the mobility of WOX5 (possibly through plasmodesmata) has been experimentally tested *in*  
97 *planta* [22, 23], no evidence of intercellular BRAVO transport has been reported. Due to its larger  
98 size (BRAVO has a molecular weight of about  $\sim 36$  kDa compared to the  $\sim 20$  kDa of WOX5 [30]),  
99 BRAVO proteins are expected to be less mobile than WOX5 proteins, if mobile at all. Moreover, the  
100 BRAVO-WOX5 complex, owing to its even larger size, is not expected to move very much from cell  
101 to cell. In this respect, while bounds on the plasmodesmata size exclusion limit (SEL) vary, estimates  
102 place the SEL lower bound to 27 kDa and upper bound to  $< 54$  kDa for QC/cortex and QC/columella  
103 stem cells, being the highest SEL at  $\sim 60$  kDa, between the endodermis/pericycle, pericycle/inner vas-  
104 culature, and cortical/epidermal cells [31], although these bounds may change depending on different  
105 environmental conditions and developmental stages. These values suggest that the BRAVO-WOX5  
106 complex cannot move from cell to cell in the SCN, while WOX5 can.

107 Taken together, these observations let us propose the following mechanism for BRAVO to confine its  
108 own promoter expression (Figure 2A). WOX5 proteins, produced in QC cells and mobile towards the  
109 VI cells, are able to activate BRAVO expression in the VI. In turn, BRAVO proteins sequester WOX5  
110 into an immobile (from cell to cell) and inactive complex, thus disrupting WOX5 movement and the  
111 subsequent activation of BRAVO expression there. Hence, the activation of the BRAVO promoter by  
112 WOX5 is spatially confined by BRAVO proteins, a restriction which becomes released when BRAVO  
113 no longer immobilizes WOX5, e.g. in the *bravo* mutant.

114 To evaluate how this mechanism can generate confinement of BRAVO expression, we constructed a  
115 minimal mathematical model, hereafter named *immobilization by sequestration* model, and studied it  
116 in one spatial dimension (Methods, Figure 2A). In this model WOX5 is able to diffuse, while BRAVO  
117 is not. Moreover, BRAVO and WOX5 proteins form an immobile complex, i.e. it cannot diffuse. To  
118 be consistent with the regulatory interactions between BRAVO and WOX5 reported previously [28], we  
119 further require the complex to be inactive, i.e. it does not transcriptionally regulate BRAVO nor WOX5.  
120 Thus, in the model, the production of BRAVO proteins is induced by WOX5, but not by WOX5 when  
121 bound to BRAVO. For the sake of simplicity, this activation is assumed to be proportional to the amount  
122 of WOX5 proteins. WOX5 is produced at a localized region (dark grey shaded area in Figure 2B)  
123 that we identify as the QC, and can diffuse in both directions, namely towards regions that could be  
124 identified as the CSC and columella cells (negative values of the position in Figure 2B), or towards  
125 the vasculature (positive values of the position in Figure 2B, where the light gray shaded region is  
126 identified as VI cells). Conversely, BRAVO can only be activated by WOX5 from the QC and towards  
127 the vasculature, but not towards the columella, thus mimicking the asymmetric activity of the BRAVO  
128 promoter in the *Arabidopsis* primary root.

129 In Figure 2B,C we show the stationary activity profiles of BRAVO and WOX5 promoters ( $p_B$ ,  $p_W$ ,  
130 respectively) and the BRAVO and WOX5 protein concentrations ( $B$  and  $W$ , respectively), obtained by  
131 numerically solving the model equations in one spatial dimension (Methods). The concentration of  
132 the protein complex (which is proportional to the product  $BW$ ) is not shown. The stationary profiles  
133 obtained when modeling the *bravo* mutant condition (Methods) are also depicted.

134 Our results support that the *immobilization by sequestration* mechanism constitutes a plausible way for  
135 BRAVO to confine its own expression in the WT (Figure 2B,C). This mechanism still holds when the  
136 activation of BRAVO expression by WOX5 is not direct but instead occurs through a WOX5 target, as  
137 long as this target does not diffuse (Methods).

138 In this mechanism, binding between WOX5 and BRAVO (mediated by the binding strength  $\lambda$ ) is  
139 necessary for the confinement to take place (Figure 2E). However, high sequestration of WOX5 by  
140 BRAVO (large  $\lambda$  and high BRAVO synthesis rate  $\alpha$ ) can lead to an overly exaggerated confinement,  
141 with BRAVO being highly expressed at the QC but not in VI cells (Figure 2D, Supplementary Figure

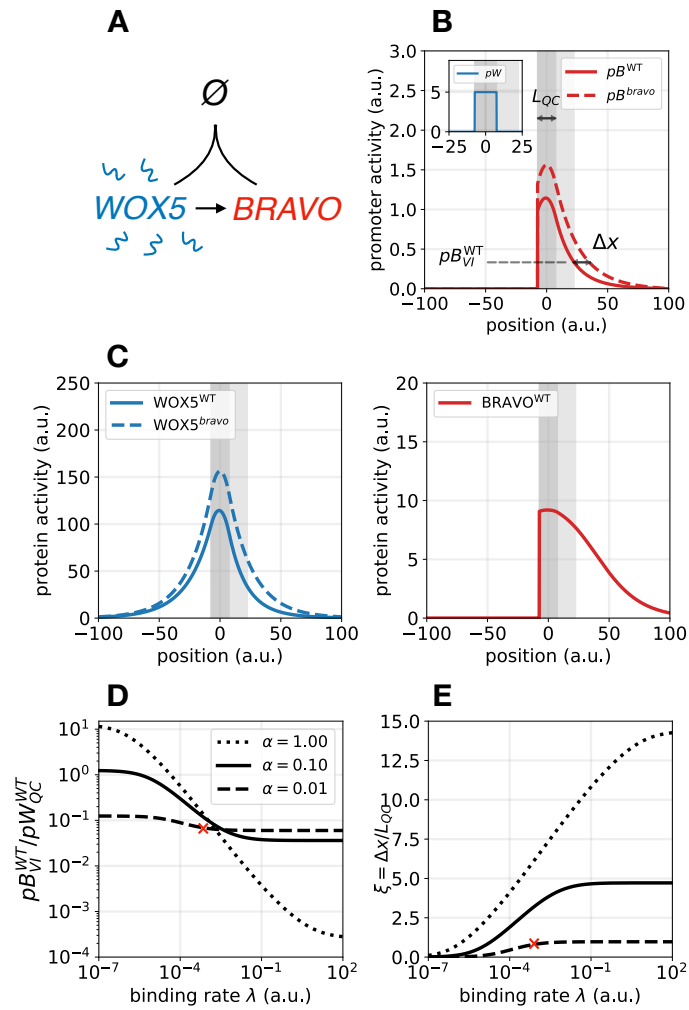

**Figure 2: Immobilization by sequestration model.** **A)** Cartoon displaying the models' interactions: WOX5 diffuses (wavy lines) and activates (arrow) BRAVO. In turn, BRAVO immobilizes WOX5 by sequestering it into an immobile and inactive complex (depicted as  $\emptyset$ ). **B)** Stationary profiles of BRAVO and WOX5 promoter activities ( $pB$  and  $pW$ ) obtained with this model in the WT (continuous lines) and in the *bravo* mutant (dashed lines). The QC region (dark gray) has a size  $L_{QC}$  and is where  $pW$  is active. For simplicity, the VI region (light gray) is defined with this same size.  $pB$  value in the WT at the end of the VI region is denoted by  $pB_{VI}^{WT}$ . The quantity  $\Delta x$  is a measure of  $pB$  expansion in the *bravo* mutant as depicted (see [Methods](#) for details). If BRAVO confines its own expression in the WT, then  $\Delta x > 0$ . **C)** Stationary protein activity profiles of BRAVO ( $B$ ) and WOX5 ( $W$ ) in WT (continuous lines) and in the *bravo* mutant (dashed lines) corresponding to the simulations in **B)**. These profiles only depict the proteins not bound to each other. **D, E)** Effect of the binding rate  $\lambda$  and of the BRAVO synthesis rate  $\alpha$  on  $pB_{VI}^{WT}$  (**D**) and on  $\Delta x$  (**E**). In **D)**, the ratio between  $pB_{VI}^{WT}$  and the constant value of  $pW$  ( $pW_{QC}^{WT} = \gamma = 5$ ) is shown. To be in agreement with experiments [28], this ratio needs to be of order  $pB_{VI}^{WT} / pW_{QC}^{WT} \sim 10^{-1}$ . In **E)**,  $\xi = \Delta x / L_{QC}$  represents the expansion of  $pB$  relative to the QC size. The curves drawn in **E)** correspond to the same  $\alpha$  values as in **D)**. The red crosses in **D)** and **E)** mark the values of  $\alpha$  and  $\lambda$  used for the simulations in **B)** and **C)**. Larger values of  $\alpha$  increase the expansion but lead to  $pB \approx pW$  at the QC in the WT ([Supplementary Figure 1](#)), which is not experimentally supported [28, 32]. In all panels, parameter values are  $\gamma = 5$ ,  $d_W = d_B = 0.01$  and  $D_W = 4$  in arbitrary units (a.u., see [Methods](#) and [Supplementary Table 1](#) for further information on parameter values choice). In **(B,C)**  $\alpha = 0.01$  and  $\lambda = 0.001$  a.u. [Supplementary Figures 1,2](#) provide supplemental information to this figure.

142 1A), a situation which would be in disagreement with the experimentally observed WT expression  
 143 ([Figure 1B](#)). Hence, the model is able to drive a self-confined expression consistent with that in real  
 144 roots for low sequestration of WOX5 by BRAVO. Indeed, low sequestration of WOX5 by BRAVO  
 145 at the QC is expected in the *Arabidopsis* root since the expression of BRAVO in the SCN and the  
 146 amount of BRAVO RNA transcripts are low compared to those of WOX5 (we take as approximate

147 value  $WOX5_{QC}^{WT} \approx 5BRAVO_{QC}^{WT}$ ) [27, 28, 32].

148 This mechanism further requires WOX5 to be mobile (Supplementary Figure 1D). The results show  
149 that if WOX5 is set to have a large diffusion coefficient, the BRAVO expression in the WT becomes  
150 larger and much fainter (Supplementary Figure 1C,D), in disagreement with WT expression in Ara-  
151 bidopsis roots [28]. Indeed, WOX5 diffusion has been reported to be rather small [22, 23]. Overall, our  
152 results indicate that the *immobilization by sequestration* mechanism is a plausible candidate to explain  
153 the observed self-confinement of BRAVO expression.

154 Since sequestration is a necessary ingredient for this mechanism to work, one could argue that the  
155 presence of other molecules also binding to BRAVO and/or WOX5 might impair or even destroy the  
156 confinement. Indeed, it is known that WOX5 and BRAVO proteins can bind to additional molecules,  
157 such as TOPLESS and BES1 [27, 28]. Since these are relatively large molecules ( $\sim 39$  kDa and  $\sim 124$   
158 kDa, respectively [30]) it would be possible for them to immobilize WOX5. Therefore, these other  
159 molecules can also generate confinement of BRAVO expression, as confirmed by modeling this sce-  
160 nario (Supplementary Figure 2). If these molecules sequester BRAVO or WOX5 excessively, prevent-  
161 ing the binding between the two, the mechanism of BRAVO self-confinement becomes compromised  
162 (Supplementary Figure 2). Therefore, in order to maintain the self-confinement of BRAVO expression  
163 in the presence of these other factors, their sequestering effect on BRAVO and WOX5 must be small.

164 Altogether, the *immobilization by sequestration* mechanism constitutes a plausible candidate for ex-  
165 plaining the self-confined BRAVO expression to both the QC and VI cells in the WT. Notably, the WT  
166 stationary profile of WOX5 proteins ( $W$ , not bound to BRAVO) obtained for this model is not sym-  
167 metric, but decays differently above and below the QC (Figure 2C). This behaviour is caused by the  
168 presence and absence, respectively, of BRAVO proteins in the two distinct spatial regions. Above the  
169 QC, the gradient of WOX5 proteins is steeper than below the QC, where BRAVO cannot be activated.  
170 Hence, the presence of BRAVO makes the WOX5 gradient more abrupt, restricting the spatial domain  
171 where WOX5 proteins are concentrated, and consequently confining the BRAVO expression domain  
172 (recall that in this simplified model BRAVO expression is proportional to WOX5 levels). Therefore,  
173 this mechanism not only drives self-confined BRAVO expression but also results in a confined action  
174 of WOX5 proteins.

## 175 2.2 BRAVO cannot confine its own expression domain in the root SCN only by 176 inactivating WOX5

177 The self-confinement of BRAVO expression in the *immobilization by sequestration* model requires  
178 WOX5 to diffuse. Experiments suggest that, while mobile, WOX5 does not move very large dis-  
179 tances [22, 23]. Hence, its small diffusion may not be sufficient to explain the self-confinement of  
180 BRAVO expression observed in real roots. Since activation of BRAVO by WOX5 could happen through  
181 intermediary molecules, we asked whether the binding between the two proteins could still be suffi-  
182 cient to drive self-confinement of BRAVO expression if WOX5 is activating BRAVO not directly, but  
183 through a highly mobile WOX5 target, hereafter named  $X$ . This mechanism also assumes that the  
184 BRAVO-WOX5 complex is transcriptionally inactive, and hence BRAVO, by binding to WOX5, pre-  
185 vents WOX5 from activating  $X$  (Figure 3A). To evaluate this scenario, we again formulated a minimal  
186 model, hereafter named *attenuation by sequestration* model (Methods), and studied its implications by  
187 numerically simulating WT and *bravo* mutant backgrounds, as done in the previous section. In this  
188 minimal model, neither WOX5, nor BRAVO nor the complex can diffuse.

189 The results confirmed that the *attenuation by sequestration* mechanism is also able to drive BRAVO

190 self-confinement (Figure 3B). In this mechanism, because WOX5 is sequestered by BRAVO, *X* be-  
191 comes less activated at the QC and hence reaches with high concentration smaller spatial regions,  
192 compared to the case when BRAVO is absent (Figure 3B). However, the results show that this mech-  
193 anism requires WOX5 to be highly sequestered by BRAVO to drive a noticeable self-confinement  
194 (Figure 3B and Supplementary Figure 3A-D). This implies that *BRAVO* has to be strongly expressed  
195 (similarly to *WOX5*) at the QC (Supplementary Figure 3). In *Arabidopsis* roots, since *WOX5* is much  
196 more strongly expressed than *BRAVO* [28](Figure 1B,C), we expect a low sequestration of WOX5 by  
197 BRAVO. This suggests that the *attenuation by sequestration* mechanism is not relevant to account for  
198 *BRAVO* self-confined expression in the *Arabidopsis* primary root SCN.

### 199 2.3 BRAVO can confine its own expression domain by repressing its mobile 200 activator

201 The *attenuation by sequestration* mechanism indicates that a transcription factor can confine its own  
202 expression by reducing the production of its mobile activator. Based on this, we envisaged a third  
203 scenario which does not have the limitations imposed by sequestration. In this case, BRAVO represses  
204 the production of its activator, *Z*, which is mobile and is activated by WOX5 (Figure 4A). We call this  
205 the *repression* model (Methods). Reported transcriptomics of QC cells have revealed that most of the  
206 genes whose mRNA levels are de-regulated in *wox5-1* and *bravo-2* mutants show opposite regulations  
207 [28], thus opening the possibility of one of these genes to act as the intermediate factor *Z*, which in our  
208 model is downregulated in the *wox5* mutant but upregulated in the *bravo* mutant. Hence, transcriptomic  
209 data in the QC [28] suggest several candidates for *Z*.

210 Simulations indicate that the *repression* mechanism is also able to induce the confinement of *BRAVO*  
211 expression (Figure 4B) and, as with previous mechanisms, shows that the action of WOX5, mediated by  
212 its target *Z*, becomes spatially restricted in the WT, while it expands in the *bravo* mutant (Figure 4B,C).

213 The *repression* mechanism relies on the repression of *Z* by BRAVO (Figure 4E) and on the mobility  
214 of *Z* (Supplementary Figure 4). Albeit movement of *Z* is required for this mechanism to drive self-  
215 confinement, simulations indicate that large diffusion coefficients of *Z* drive a *BRAVO* expression in  
216 the WT that is too faint and too spread to be compatible with the GFP expression in *Arabidopsis* root  
217 SCN (Supplementary Figure 4, Figure 1). This suggests that the diffusion coefficient of *Z* should be  
218 small.

219 As opposed to the *attenuation by sequestration* mechanism, the *repression* mechanism does not require  
220 a very strong *BRAVO* expression in the WT to drive noticeable self-confinement (i.e. the concentration  
221 threshold of BRAVO to repress *Z* is low). Accordingly, *BRAVO* expression values lower than those  
222 of *WOX5*, as seen in the *Arabidopsis* root SCN, are consistent with strong self-confinement through  
223 repression (Figure 4B). Further analysis of the model shows that strong repressions enhance the self-  
224 confinement, but can result in unrealistic *BRAVO* expression profiles in the WT, limited only to the QC  
225 and not reaching the VI cells (Figure 4D,E). In addition, strong repression involves not only spatial  
226 confinement but also a dramatic reduction of *BRAVO* expression at the QC in the WT scenario com-  
227 pared to the *bravo* mutant (Supplementary Figure 4), a situation which is not observed experimentally  
228 [28](Figure 1B,C). Taken together these results indicate that if the *repression* mechanism takes place at  
229 the SCN of *Arabidopsis* to confine the *BRAVO* expression domain, then BRAVO represses the WOX5  
230 target *Z* only weakly.

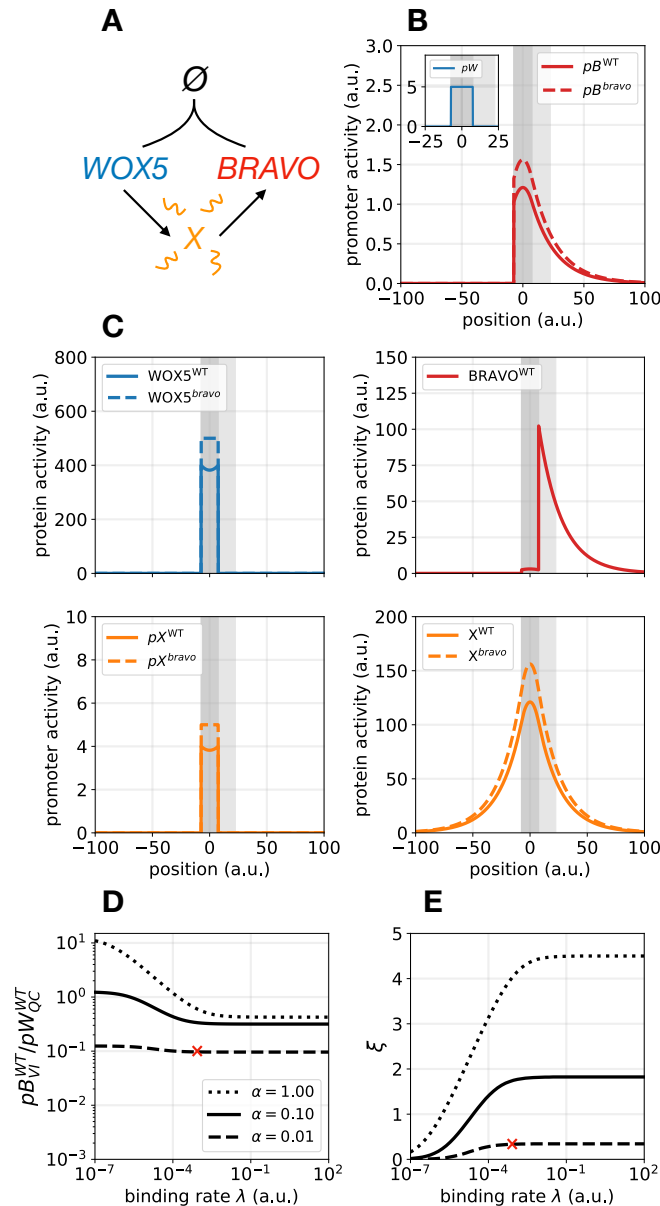

**Figure 3: Attenuation by sequestration model.** **A**) Cartoon of the interactions: WOX5 activates a highly diffusible intermediary  $X$ , which in turn activates BRAVO. BRAVO sequesters and inactivates WOX5, preventing the activation of  $X$ . **B**) Stationary activity profiles of  $pB$  and  $pW$  in WT (continuous lines) and in the *bravo* mutant (dashed lines). **C**) Stationary profiles of BRAVO ( $B$ ), WOX5 ( $W$ ) and  $X$  protein activities, as well as promoter activity  $pX$ , in WT (continuous lines) and in the *bravo* mutant (dashed lines) corresponding to the simulations in **B**). **D**, **E**) Effect of the binding rate  $\lambda$  and of the BRAVO synthesis rate  $\alpha$  on  $pB_{VI}^{WT}$  (**D**) and on  $\Delta x$  (**E**). In **D**), the ratio between  $pB_{VI}^{WT}$  and the constant value of  $pW$  is shown ( $pW_{QC}^{WT} = \gamma = 5$ ). In **E**)  $\xi = \Delta x / L_{QC}$  is shown with same  $\alpha$  values as in **D**). Red crosses mark the values of  $\alpha$  and  $\lambda$  used for the simulations in **B**) and **C**). In all panels  $\gamma = 5$ ,  $\beta = 0.01$ ,  $d_W = d_B = d_X = 0.01$  and  $D_X = 4$  in arbitrary units (a.u., [Methods, Supplementary Table 1](#)). In (**B**,**C**)  $\alpha = 0.01$  and  $\lambda = 0.001$  a.u. [Supplementary Figure 3](#) provides supplemental information to this figure.

## 231 2.4 The immobilization by sequestration mechanism is sufficient and the re- 232 pression mechanism enhances self-confinement in *Arabidopsis*

233 Our previous results suggest that both the *immobilization by sequestration* and the *repression* mecha-  
234 nisms are conceivable candidates to explain the self-confined expression of *BRAVO* in the *Arabidopsis*  
235 root SCN. However, it remains unclear whether the diffusion of WOX5 is sufficiently large to make



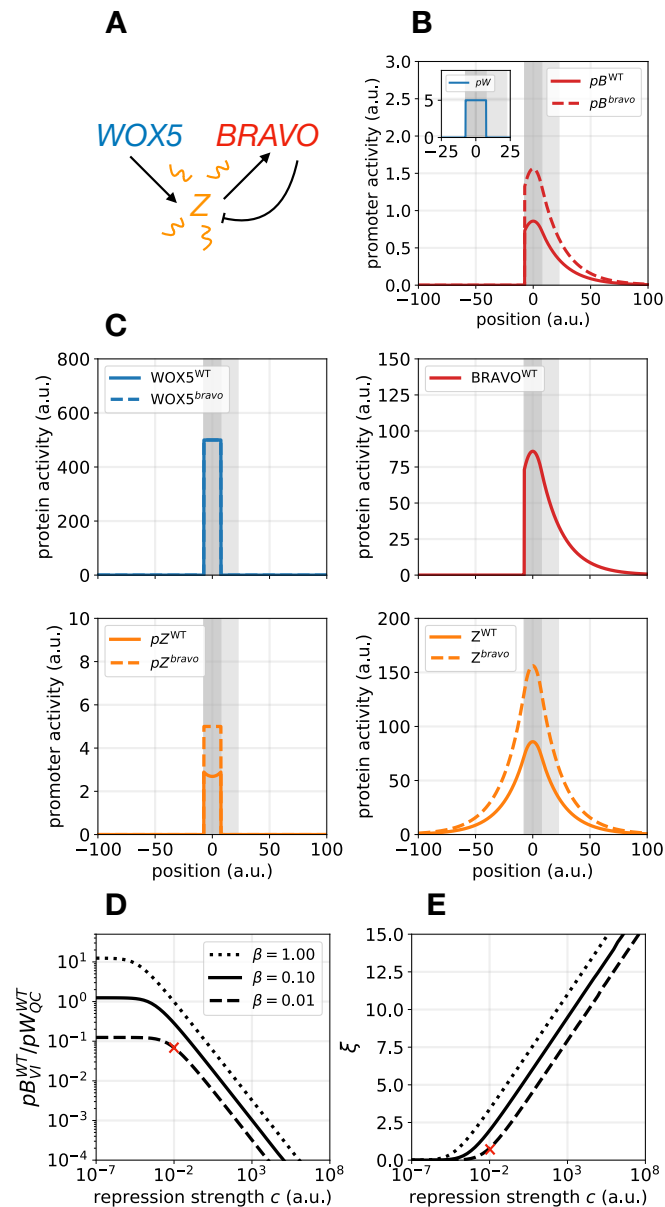

**Figure 4: Repression model.** **A**) Sketch of the interactions: WOX5 activates a diffusible factor Z, which activates BRAVO. BRAVO, in turn, is able to repress (blunt arrow) the activity of Z. **B**) Stationary activity profiles of  $pB$  and  $pW$  in WT (continuous lines) and in the *bravo* mutant (dashed lines) obtained with the repression model. **C**) Stationary profiles of BRAVO (**B**), WOX5 (**W**) and Z protein activities as well as promoter activity  $pZ$ , in WT (continuous lines) and in the *bravo* mutant (dashed lines) corresponding to the simulations in **B**). **D**, **E**) Effect of the repression strength  $c$  and of the Z synthesis rate  $\beta$  on  $pB_{VI}^{WT}$  (**D**) and on  $\Delta x$  (**E**). In **D**, the ratio between  $pB_{VI}^{WT}$  and the constant value of  $pW$  is shown ( $pW_{QC}^{WT} = \gamma = 5$ ). In **E**)  $\xi = \Delta x / L_{QC}$  is shown with same  $\beta$  values as in **D**). Red crosses mark the values of  $c$  and  $\beta$  used for the simulations in **B**) and **C**). Larger  $\beta$  and  $c$  values drive larger expansions but involve a very strong increase of  $pB$  levels in the *bravo* mutant (see [Supplementary Figure 4](#)), which is not in agreement with experiments ([Figure 1](#)). In all panels parameter values are  $\alpha = 0.01$ ,  $\gamma = 5$ ,  $d_W = d_B = d_Z = 0.01$  and  $D_Z = 4$  in arbitrary units (a.u., [Methods](#), [Supplementary Table 1](#)). In **(B,C)**  $\beta = 0.01$  and  $c = 0.01$  a.u. [Supplementary Figure 4](#) provides supplemental information to this figure.

236 the *immobilization by sequestration* mechanism sufficient, and whether the weak repression required  
 237 in the *repression* model is enough to produce the confinement observed in real roots. To address these  
 238 issues, we modelled these mechanisms on realistic root layouts, where the cellular geometry of the  
 239 roots is explicitly incorporated. We assumed both mechanisms to be present at the same time (which  
 240 incidentally also incorporates the *attenuation by sequestration* mechanism as a side-effect) ([Figure 5A](#),

241 hereafter named *mixed model*). WOX5 can move between cells and activates a mobile target  $Z$ , which  
242 activates BRAVO, and BRAVO feeds back on  $Z$  to repress its activity. BRAVO and WOX5 are able to  
243 bind together, forming a transcriptionally inactive complex which is not able to activate  $Z$  and which,  
244 like BRAVO, cannot move from cell to cell. We next evaluated this mixed model in realistic root  
245 geometries to assess whether it can predict the changes in expression observed in *Arabidopsis* roots.  
246 Besides modeling the dynamics of BRAVO and WOX5, we also modelled the dynamics of GFP pro-  
247 teins produced by the BRAVO and WOX5 promoters, denoted by  $pBRAVO:GFP$  and  $pWOX5:GFP$ .  
248 For GFP molecules, the production was set to be proportional to their corresponding promoter activi-  
249 ties, and their degradation was set to be linear (just like the others). In addition, GFP molecules were  
250 assumed to be mobile, both within and between cells.

251 The implementation of the mixed model in two-dimensional root geometries considered the realistic  
252 shape of cells and the presence of cell walls. The geometries of WT and *bravo* mutant roots were  
253 considered separately, by using different layouts. The main features included in this new framework  
254 can be enumerated as follows (for further details, see [Methods](#) and [SI](#)).

- 255 1. The spatial discretization of the realistic root layout was made at the pixel scale. Hence, the size  
256 of the cytoplasm and cell walls is determined by the number and localization of their correspond-  
257 ing pixels ([Supplementary Figure 5](#)).
- 258 2. The dynamics of the molecular components in the interior of the cells is distinct to the dynamics  
259 in the cell walls. Specifically, in all the pixels belonging to the cell's interior, molecules can be  
260 produced, regulated, degraded, can sequester other molecules and are able to diffuse. Inside the  
261 cell walls, however, molecules are only able to diffuse.
- 262 3. The diffusion coefficient in the cell wall is set to be smaller than in the interior of the cells.  
263 With this assumption the physical boundaries between cells are naturally incorporated, leading  
264 to discontinuities in the concentration profiles of molecular factors. These are to be expected for  
265 any molecule diffusing freely inside the cytoplasm but moving only occasionally from cell to cell,  
266 as it may happen, for example, in plasmodesmata-mediated transport. For simplicity (and lack of  
267 evidence), we assume that BRAVO and the BRAVO-WOX5 complex can only move inside the  
268 cell, and are unable to diffuse through cell walls. Conversely, WOX5 and  $Z$  proteins can move  
269 inside the cytoplasm with diffusion coefficients  $D_W^{cyt}$  and  $D_Z^{cyt}$ , respectively, and between cells  
270 with diffusion coefficients  $D_W^{wall}$  and  $D_Z^{wall}$ , respectively. The diffusion coefficient of GFP and  
271 WOX5 proteins was assumed to be similar, both in the cytoplasm and in the cell wall, since both  
272 proteins have aminoacid sequences of similar lengths ( $\sim 20$  kDa for WOX5 and  $\sim 27$  kDa for  
273 GFP [30]). Because GFP proteins are able to diffuse from cell to cell, they can reach cells where  
274 there is no promoter activity. However, the diffusion at the cell wall is set to be sufficiently low  
275 so that this effect is small.
- 276 4. Cells are classified by cell type. We defined nine different cell types: quiescent center, vascular  
277 initials, vascular cells, cortex, endodermis, epidermis, columella stem cells, columella cells, and  
278 lateral root cap cells ([Figure 1A](#)). This classification enables setting different dynamics for the  
279 proteins in distinct cell types, as well as different transport properties (through different diffusion  
280 coefficients). We set the activation of BRAVO by WOX5 only in the QC, vascular initials,  
281 vascular cells, cortex and endodermis, but not in the remaining cell types ([Supplementary Figure](#)  
282 [6](#)). This last assumption is based on the experimental observation that *BRAVO* is expressed only  
283 in inner tissues, from the SCN upwards. To account for the expression of BRAVO promoter  
284 in some VI and V cells in the *wox5* mutant [28] ([Figure 1D](#)), basal production of BRAVO,

285 independent of WOX5, is set in few of these cells ([Supplementary Figure 7](#)). For simplicity,  
286 WOX5 is only allowed to be produced at the QC (albeit recent observations show that low values  
287 of promoter expression are also present in the vascular initials [[22](#), [23](#)]). Finally, diffusion and  
288 degradation can occur in all cell types.

289 To avoid the possible drawbacks caused by linear synthesis rates used in the minimal models presented  
290 (such as the lack of saturation and thresholds of activity), herein we used transcriptional regulations  
291 described by Hill functions, with basal activity and saturation values ([Methods](#)). In order to account  
292 for the increased WOX5 promoter expression in the *wox5* mutant, we included a negative feedback on  
293 WOX5, a regulation that, in turn, induces a decrease in WOX5 activity in the *bravo* mutant scenario,  
294 as sequestration of BRAVO by WOX5 allows the WOX5 promoter to be less repressed in the WT [[28](#)].

295 Assuming biologically realistic parameters for diffusion, production and degradation of molecules (see  
296 [Supplementary Table 3](#)), we found that the mixed model can explain the behaviour of *pBRAVO:GFP*  
297 in the WT and the expansion of its domain in the *bravo* mutant (compare [Figure 5A](#) with [Figure 1B,C](#)).  
298 Here, WOX5 diffusion is set to be low enough such that its promoter activity, in the absence of any  
299 regulatory factor, is mostly localized at the QC, VI and CSC ([Supplementary Figure 8](#)), as found exper-  
300 imentally. The simulations show that BRAVO self-confinement additionally induces WOX5 proteins  
301 and the diffusible target Z to be confined ([Supplementary Figure 9](#)).

302 The small diffusion of WOX5 is sufficient to drive a realistic confinement of *pBRAVO:GFP* through the  
303 *immobilization by sequestration* mechanism alone ([Figure 5B](#)). However, this only happens if activa-  
304 tion of BRAVO by WOX5 occurs through a non-diffusible WOX5-target Z ([Figure 5C](#)). For a diffusible  
305 Z, the *repression* mechanism is required to drive BRAVO self-confinement ([Figure 5A,C](#)). Under these  
306 circumstances, sequestration between BRAVO and WOX5 facilitates a higher *pBRAVO:GFP* expres-  
307 sion in the WT ([Figure 5A,D](#)).

308 Taken together, the results in the realistic root layout support that the immobilization of WOX5 by  
309 BRAVO is sufficient for the self-confined expression of *BRAVO* in the root SCN.

### 310 **3 Discussion**

311 We have previously shown that BRAVO and WOX5 regulate each other expressions and that their  
312 binding into a protein complex can be relevant for these regulations and for BRAVO and WOX5 action  
313 on QC divisions [[28](#)]. Here we have shown that these interactions, together with the diffusion of  
314 WOX5, are sufficient to account for the spatially self-confined expression of *BRAVO*, as revealed by  
315 the *immobilization by sequestration* mechanism. Furthermore, the opposite regulation of common  
316 targets by WOX5 and BRAVO, as inferred by transcriptional profiling [[28](#)], support the complementary  
317 scenario where this confinement is induced by a negative feedback between BRAVO and a factor  
318 activated by WOX5 (the *repression* mechanism).

319 These mechanisms establish a negative feedback of BRAVO on itself. As such, they mechanistically  
320 account, at least partially, for the effective negative self-regulation of BRAVO expression in the whole  
321 SCN previously proposed [[28](#)]. Moreover, the results herein indicate that this negative regulation is  
322 dependent on WOX5.

323 To obtain these results we investigated three regulatory mechanisms for self-confined expression (*im-*  
324 *mobilization by sequestration*, *attenuation by sequestration* and *repression*). These three mechanisms  
325 have in common that the emergence of self-confinement involves a negative feedback with a mobile

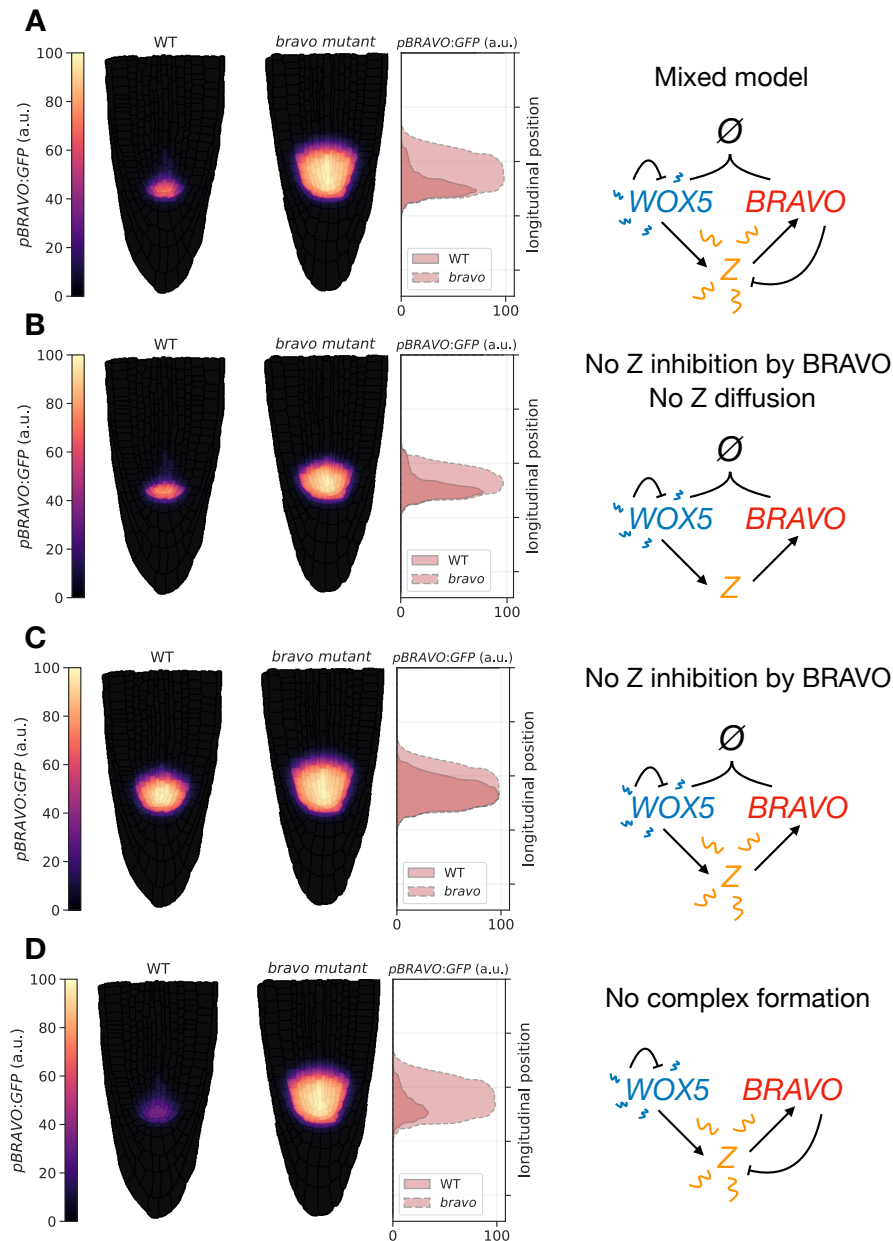

**Figure 5: *pBRAVO:GFP* simulated in realistic root layouts.** Simulation results for the stationary activity of *pBRAVO:GFP* in WT (left root) and in *bravo* mutant (right root) for different regulatory interactions (each depicted as a cartoon on the right). The middle panel depicts *pBRAVO:GFP* along the midline longitudinal (vertical axis). **A**) Mixed model: WOX5 is able to diffuse, self-repress and activate a highly mobile intermediary Z. This intermediary activates BRAVO, which in turn feeds back on Z to repress its activity. BRAVO and WOX5 can bind into an immobile and inactive complex. In the WT, *pBRAVO:GFP* is confined to the SCN, and it is expanded in the *bravo* mutant. The stationary profiles of all other molecules are depicted in [Supplementary Figure 9](#). **B**) Confined expression of *pBRAVO:GFP* can still be obtained when Z does not diffuse and is not repressed by BRAVO (this corresponds to the *immobilization by sequestration* mechanism). The expansion in the *bravo* mutant is smaller than for the mixed model. **C**) The mixed model without the repression of Z by BRAVO makes *pBRAVO:GFP* to be more expanded in the WT, and with similar absolute levels as in the *bravo* mutant. Hence, little confinement is achieved in the WT. **D**) If there is no binding between BRAVO and WOX5, the activity of *pBRAVO:GFP* in the WT dramatically decreases due to stronger repression through Z. In all panels, cell walls are superimposed (in black with transparency) over the colormap so they can be easily visualized. Parameter values in [Supplementary Table 3](#). [Supplementary Figures 5-9](#) provide supplemental information to this figure.

326 activator and an immobile inhibitor. Each of the three mechanisms can be understood as a different reg-  
 327 ulatory way for this negative feedback to be accomplished: by immobilizing or by reducing, through

328 sequestration or repression, the production of the activator. Therefore they can be placed within a  
329 general framework of self-confinement, which could go under the generic name of *attenuation of a*  
330 *mobile activator*. All these mechanisms drive the self-confinement of both the repressor and the acti-  
331 vator. Yet, the three mechanisms are not equivalent, each of them having their distinct characteristics,  
332 as our analysis revealed. The most noticeable feature is perhaps the fact that the immobilization mech-  
333 anism involves a change in the gradient profile of the activator (Figure 2D, SI Text) whereas the other  
334 mechanisms do not.

335 A different mechanism to drive self-confined expression has been proposed for WUSCHEL in the shoot  
336 apical meristem of *Arabidopsis*. According to it, WUSCHEL protein confines its own expression by  
337 activating its repressor, CLAVATA3, which is highly mobile [12, 33]. Both this mechanism and the  
338 *attenuation of a mobile activator* studied here have in common that a negative feedback is responsible  
339 for the self-confinement. However, in the *attenuation of a mobile activator* the strongly mobile com-  
340 ponent is the activator and not the repressor. The generic process of *attenuation of a mobile activator*  
341 is thus a distinct mechanism for self-confinement and, because of its minimal assumptions, we expect  
342 it, or a variant thereof, to take place in very distinct developmental contexts. For instance, Hedgehog  
343 signaling in the *Drosophila* wing confines its own expression by activating one of its repressors, the  
344 nuclear zinc finger *Master of thickveins* [34]. Thus, this Hedgehog self-confinement may be framed  
345 within the *attenuation of a mobile activator* mechanism, where Hedgehog signaling acts as the mobile  
346 activator (*Z* in the repressor model) and *Master of thickveins* acts as the immobile repressor.

347 The mechanism of *immobilization by sequestration* can be related to mechanisms for robust morphogen  
348 gradient profiles [35, 36]. Morphogens are ligand molecules that are produced at localized sources but  
349 can diffuse, generating an activity gradient that can then be interpreted by different genes, activating  
350 or repressing them in a concentration-dependent manner. It has been proposed that the sequestering of  
351 the morphogen by receptors might lead to an effective non-linear degradation of the ligand, resulting in  
352 concentration profiles that are robust to changes in the rate of production at the source [35]. We could  
353 make the correspondence between such models and ours by identifying WOX5 as the morphogen and  
354 BRAVO as the receptor. In agreement with what has been described for morphogen gradients induced  
355 by non-linear degradation [35], we find that the gradient of WOX5 decays much more abruptly in the  
356 presence of BRAVO than without, thus suggesting that the specific regulations between BRAVO and  
357 WOX5 may be tuned to achieve robust activity profiles.

358 Modeling of root tissues has been most commonly done in terms of simplified rectangular geometries  
359 in which cells and cell walls are subdivided in squares or rectangles [37, 38], or by considering cellular  
360 layouts with diffusing molecules between but not within cells [39, 12, 40]. By using pixels as the basic  
361 unit for discretization, we are able to model the shapes of cells in a realistic manner, and consider  
362 both the interactions within and between cells. A similar pixel-based approach has been used to model  
363 hormonal crosstalk in the *Arabidopsis* root [41]. Mathematically, our framework can be characterized  
364 as a reaction-diffusion model in heterogeneous media, where the spatial inhomogeneities appear due to  
365 the presence of cell walls, which involve different diffusion coefficients. The realistic root layout used  
366 for the simulations can be extended to include internal structures within the cells (such as the nucleus)  
367 as well as structures in the cell walls (e.g. specific communication channels). Therefore, it has the  
368 potential to implement and evaluate much more complex scenarios in a manageable way.

369 The similarities between stem cell niche organization in animals and plants may represent the outcome  
370 of convergent evolution [42]. Multicellularity – a necessary condition for stem cell niches to emerge  
371 – is thought to have evolved independently in both kingdoms [43, 44], implying that their presence in  
372 widely disparate organisms may be a direct consequence of developmental constraints and not of his-  
373 torical contingencies. Similar mechanisms of niche regulation are therefore to be expected, not through

374 common genes or molecules, but through more general regulatory principles. The fact that stem cell  
375 niches consist on narrow regions of few cells clustered together, in opposition to large numbers of cells  
376 distributed over the whole organism, possibly emerged as a way to ensure a proper balance between  
377 centralized renewal and genome integrity, by minimizing deleterious mutations which may be able to  
378 spread across whole cell lineages [17, 45]. Indeed, the smaller the population of stem cells and the  
379 lower their division rate, the less likely for deleterious mutations to accumulate in differentiated tis-  
380 sues [46]. The mechanism proposed in this paper establishes a balance between the communication  
381 mediated by the activator (WOX5) with confining its action, ensuring communication remains local.

382 In the Arabidopsis SCN, these signals allow cells to communicate between them and with other cell  
383 types, at the same time as they create boundaries within which local information can be transmitted.  
384 Indeed, QC cells have been shown to influence neighboring cell types such as the CSC, where WOX5  
385 can play a crucial role as a signaling agent [21]. We propose that towards the vasculature, BRAVO  
386 can be a signaling molecule, which, by actively restraining its own expression from reaching cells far  
387 away from its source, ensures that the small microenvironment of the SCN remains confined within the  
388 root. The molecular processes underlying this spatial restriction and their implications for proper stem  
389 cell renewal are just beginning to be uncovered. Mechanisms like the ones proposed here involve very  
390 general principles which contribute to the understanding of stem cell populations not only in plants,  
391 but in multicellular organisms on the whole.

## 392 4 Methods

393 The models formulated set the rate of change of protein concentrations of BRAVO ( $B$ ) and WOX5 ( $W$ ),  
394 by using partial differential equations where the transport of the mobile proteins is modelled through  
395 diffusion. In the models where intermediate factors are present ( $X$  in the attenuation by sequestra-  
396 tion model and  $Z$  in the repression model), their dynamics is also considered. We only focus on the  
397 stationary solutions of the models, assuming these account for the experimentally reported expressions.

398 In all the models, the rate of synthesis of each protein is assumed to be proportional to its correspond-  
399 ing promoter activity and the quasi-stationary approximation for mRNAs (i.e. mRNAs dynamics are  
400 assumed to be very fast compared to the dynamics of proteins) is done (see SI Text). For simplicity,  
401 proteins are assumed to degrade linearly. The rate at which two proteins form a complex is assumed  
402 to be proportional to the product between the two protein concentration variables (e.g.  $\propto BW$  for the  
403 BRAVO-WOX5 complex). Therefore, we only consider pair-wise interactions, omitting higher order  
404 reactions. The complex is assumed to bind reversible and to degrade linearly, with very fast dynamics  
405 enabling its quasi-steady state approximation. As a result, the concentration of complex is not ex-  
406 plicitly computed, but only the amounts of not bound proteins. Since all results are computed at the  
407 stationary state, this does not introduce any additional approximation. Finally, complexes are taken  
408 to be unable to transcriptionally regulate any of the proteins considered (for simplicity we name them  
409 inactive complexes, albeit they could regulate other factors not modelled herein). SI Text contains  
410 further details on the derivation of the models equations from the full set of equations which include  
411 mRNAs and complexes. This modeling approach is analogous to [28].

412 Subsections 4.1, 4.2 and 4.3 describe the one-dimensional minimal models in WT scenarios, while  
413 the dynamics of *bravo* mutants are described in section 4.4. Section 4.5 describes how the BRAVO  
414 stationary profiles obtained from the minimal models in the WT and the *bravo* mutant are compared, as  
415 well as the constraints imposed by experimental data on the parameter values. Section 4.6 details the  
416 construction of the realistic root layout. Section 4.7 describes the equations used for the simulations of

417 the mixed model in the realistic root layout. Section 4.8 explains the numerical details of all models  
418 simulated.

## 419 **4.1 Immobilization by sequestration mathematical model**

420 In this case, WOX5 activates BRAVO, while both proteins are able to form an inactive complex, which  
421 is rapidly degraded. For simplicity, the activation of BRAVO by WOX5 is set to be linear. In the WT,  
422 the dynamics of  $B$  and  $W$  are:

$$\frac{\partial B(x,t)}{\partial t} = \alpha W(x,t) - \lambda B(x,t)W(x,t) - d_B B(x,t) \quad (1)$$

$$\frac{\partial W(x,t)}{\partial t} = \gamma_{QC}(x) - \lambda B(x,t)W(x,t) - d_W W(x,t) + D_W \frac{\partial^2 W(x,t)}{\partial x^2} \quad (2)$$

423 where  $x$  denotes the spatial position in one dimension and  $t$  denotes time. Here  $B$  and  $W$  stand for  
424 the BRAVO and the WOX5 protein concentrations, respectively, when are not bound to each other,  
425 and the complex they form is not explicitly modelled as a variable (see [SI Text](#)). The parameter  $\alpha$   
426 measures the production rate of BRAVO per unit concentration of WOX5, and due to the linearity  
427 of the promoter, has units of inverse time. WOX5 is produced at a constant rate  $\gamma_{QC}(x)$ , where the  
428 subscript and the explicit spatial dependence indicate that it is only produced at the QC. We choose  
429  $\gamma_{QC}(x)$  to be a rectangular function of the form

$$\gamma_{QC}(x) = \begin{cases} 0 & \text{if } |x| \geq L_{QC}/2 \\ \gamma & \text{if } |x| < L_{QC}/2 \end{cases} \quad (3)$$

430 where  $L_{QC}$  is the total length of the QC region. This implies that WOX5 production only occurs in  
431 the region delimited by  $-\frac{L_{QC}}{2} \leq x \leq \frac{L_{QC}}{2}$ , with constant production rate  $\gamma$ . Degradation of BRAVO and  
432 WOX5 is controlled by the parameters  $d_B$  and  $d_W$ , respectively. Complex formation between BRAVO  
433 and WOX5 is mediated by the parameter  $\lambda$ , which sets the rate at which the two factors interact per  
434 concentration unit of each of them and involves binding, unbinding and degradation rates ([SI Text](#)).  
435 Finally, WOX5 is able to diffuse from the QC with rate  $D_W$ . As explained in detail in [SI](#), in order to have  
436 confinement through the immobilization by sequestration mechanism, it is essential for the formation  
437 of the BRAVO-WOX5 complex to be either irreversible, or reversible but being subject to degradation.  
438 The *immobilization by sequestration* model constitutes a simplified but spatially dependent version of  
439 the *complex formation model* proposed in [\[28\]](#) to explain the regulations between BRAVO and WOX5  
440 in the whole *Arabidopsis* stem cell niche.

441 The promoter activities of BRAVO and WOX5, which are computed at the stationary state (i.e. when  
442 all time derivatives are zero), are defined as  $pB(x) = \alpha W_s(x)$  and  $pW(x) = \gamma_{QC}(x)$ , respectively, where  
443  $W_s(x)$  denotes the spatial profile of WOX5 in the stationary state, as indicated by the subscript  $s$ . We  
444 also refer to these activities as promoter expressions.

445 Another version of this model, where an additional sequestrator affects the dynamics of BRAVO and  
446 WOX5, is described in [SI](#) (with results in [Supplementary Figure 2](#)).

## 4.2 Attenuation by sequestration mathematical model

In this second scenario WOX5 activates an intermediary factor  $X$ , which in turn activates BRAVO.  $X$  is able to diffuse whereas WOX5 is not. BRAVO and WOX5 form a complex, assumed to be inactive and immobile. The dynamics of  $B$ ,  $X$  and  $W$  in the WT are:

$$\frac{\partial B(x,t)}{\partial t} = \alpha X(x,t) - \lambda B(x,t)W(x,t) - d_B B(x,t) \quad (4)$$

$$\frac{\partial X(x,t)}{\partial t} = \beta W(x,t) - d_X X(x,t) + D_X \frac{\partial^2 X(x,t)}{\partial x^2} \quad (5)$$

$$\frac{\partial W(x,t)}{\partial t} = \gamma_{QC}(x) - \lambda B(x,t)W(x,t) - d_W W(x,t) \quad (6)$$

As in the previous model,  $B$  and  $W$  stand for the proteins not bound to each other. The new parameters  $\beta$ ,  $d_X$  and  $D_X$  characterize the production, degradation and diffusion of the intermediary factor  $X$ , respectively. In this model, the BRAVO promoter in the stationary state is denoted by  $pB(x) = \alpha X_s(x)$ , where  $X_s(x)$  denotes the concentration profile of the intermediary in the stationary state, while the WOX5 promoter remains as in the previous case,  $pW(x) = \gamma_{QC}(x)$ , with  $\gamma_{QC}$  only affecting the QC region (as in Eq.(3)). [SI](#) describes an alternative version of this model where WOX5 is allowed to diffuse (results shown in [Supplementary Figure 3](#)).

## 4.3 Repression of a mobile activator mathematical model

In this case, WOX5 activates an intermediary factor  $Z$ , which activates BRAVO. In turn, BRAVO feeds back on  $Z$  by repressing it.  $Z$  diffuses whereas WOX5 and BRAVO do not. Binding between BRAVO and WOX5 is not present. The dynamics of  $B$ ,  $Z$  and  $W$  in the WT are:

$$\frac{\partial B(x,t)}{\partial t} = \alpha Z(x,t) - d_B B(x,t) \quad (7)$$

$$\frac{\partial Z(x,t)}{\partial t} = \frac{\beta W(x,t)}{1 + cB(x,t)} - d_Z Z(x,t) + D_Z \frac{\partial^2 Z(x,t)}{\partial x^2} \quad (8)$$

$$\frac{\partial W(x,t)}{\partial t} = \gamma_{QC}(x) - d_W W(x,t) \quad (9)$$

The parameters  $\beta$ ,  $d_Z$  and  $D_Z$  describe the production, degradation and diffusion of  $Z$ , respectively, while the new parameter  $c$  sets the threshold of  $Z$  repression by BRAVO. In this case, promoter activities in the stationary state are given by  $pB(x) = \alpha Z_s(x)$ ,  $pZ(x) = \frac{\beta W_s(x)}{1 + cB_s(x)}$  and  $pW(x) = \gamma_{QC}(x)$  (defined by Eq.(3)), where again the subscript  $s$  indicates that the concentration profiles are those corresponding to the stationary state.

## 4.4 Modeling *bravo* mutants

The same type of approach as in [28] is used to simulate the *bravo* mutant. Specifically, to model this mutant, the very same dynamical equations and the same parameter values are used as those to model



the WT, except for BRAVO which is set as  $B(x, t) = 0$  for all  $x$  and  $t$ . This leads to stationary values of  $W_s(x)$ ,  $X_s(x)$  and  $Z_s(x)$  that are different than in the WT. While no dynamical equation for  $B(x, t)$  is set, there is a promoter activity of BRAVO in the stationary state,  $pB(x)$ , which is as defined for the WT but with the stationary profiles of the mutant. We exemplify this with the immobilization by sequestration model. Setting  $B(x, t) = 0$  into equations (1,2), we get:

$$\frac{\partial W^{bravo}(x, t)}{\partial t} = \gamma_{QC}(x) - d_W W^{bravo}(x, t) + D_W \frac{\partial^2 W^{bravo}(x, t)}{\partial x^2} \quad (10)$$

468 where the new superscript *bravo* indicates that the solution of the equation corresponds to the *bravo*  
 469 mutant. The stationary BRAVO promoter is  $pB^{bravo}(x) = \alpha W_s^{bravo}(x)$ . The same procedure is applied  
 470 for the other models.

## 471 4.5 Measures of expansion and intensity of simulated BRAVO expression

472 For simplicity, in the one-dimensional minimal models, the VI region (light gray area in Figures 2B,C,  
 473 3B,C, 4B,C) is defined to be of the same size as the QC region ( $L_{QC}$ ,  $x \in [-L_{QC}/2, L_{QC}/2]$ ). Hence, the  
 474 end of the VI is at position  $x_{VI} = 3L_{QC}/2$ . To quantify whether the simulation results of the minimal  
 475 models show a stationary BRAVO promoter expression more extended in the *bravo* mutant than in the  
 476 WT, we compute the value of the stationary BRAVO promoter expression in the WT at the end of the  
 477 VI region and define this value as  $pB_{VI}^{WT} \equiv pB(x_{VI})$ . We then compute the spatial position at which the  
 478 stationary BRAVO promoter expression in the *bravo* mutant takes this value, and define this position  
 479 as  $x^{bm}$  (i.e.  $x^{bm}$  is defined as  $pB^{bravo}(x^{bm}) = pB_{VI}^{WT}$ ). Then, we define  $\Delta x \equiv x^{bm} - x_{VI}$  and use it as the  
 480 measure of how much the BRAVO promoter expression in the *bravo* mutant is expanded ( $\Delta x > 0$ ) or  
 481 contracted ( $\Delta x < 0$ ) compared to its expression in the WT. This change is then normalized to the size  
 482 of the QC region, by defining the non-dimensional parameter  $\xi$ :

$$\xi \equiv \frac{\Delta x}{L_{QC}}. \quad (11)$$

483 Thus,  $\xi$  quantifies the change of stationary BRAVO promoter expression in the *bravo* mutant relative  
 484 to the size of the QC, i.e.  $\xi = 1$  means that the stationary BRAVO promoter expression in the *bravo*  
 485 mutant is expanded a region as large as the QC compared to the WT.

486 We also computed for the WT the ratio between the stationary BRAVO promoter expression at the end  
 487 of the VI and the stationary WOX5 promoter expression at the QC ( $x = 0$ ):

$$R = \frac{pB_{VI}^{WT}}{pW_{QC}^{WT}} \quad (12)$$

488 To make the connection with experimental data, we impose that this quantity must remain within  
 489 a certain interval close to  $R \simeq 0.05 - 0.1$ , which is within the range observed in experimental data  
 490 [28, 32]. Moreover, to be in agreement with BRAVO and WOX5 expression data in WT Arabidopsis  
 491 roots [28, 32], we further impose that in the QC the WT BRAVO promoter must be  $\sim 0.2$  times the  
 492 value of the WOX5 promoter, i.e.  $pB^{WT}(x=0)/pW^{WT}(x=0) \sim 0.2$ . The parameter values in panels  
 493 B and C (i.e. those corresponding to the red crossed in panels D and E) of Figure 2, Figure 3 and  
 494 Figure 4 satisfy all these conditions, resulting in values of  $\xi$  that qualitatively match the experimental  
 495 observations in the *bravo* mutant.

## 4.6 Construction of realistic root layouts

In order to build two-dimensional realistic root layouts with which we can subsequently implement the corresponding reaction-diffusion equations (e.g. the Mixed model in next subsection), we start by taking a confocal image of a middle plane of the root with PI-stained cell walls and we apply a segmentation routine which divides the root at the pixel scale and into its constituent cellular regions and cell walls (Supplementary Figure 5). To do this, we make extensive use of the *scikit-image* collection of Python-based algorithms (*threshold\_otsu*, *skeletonize* and *label*) [47]. In particular, we first define the cell boundaries with the *threshold\_otsu* method, which transforms the original image into a thresholded binary image where only cell wall pixels remain. We then *skeletonize* to obtain a cell wall with a fixed width (2 pixels). We then apply the *label* function on the modified image to label distinct regions (each label constitutes the collection of pixels belonging to the particular region). We chose to define labels that enable to distinguish between cells and between the cell wall and the outside of the root as follows. All pixels within a cell have the same label, which is distinct from that of pixels in any other cell. With this routine, we can access each cell as an individual entity, and we can modify its properties as a whole (e.g. change the parameter values of the protein dynamics in all pixels of that cell). A single label is assigned to all the pixels in any cell wall. Thus all cell walls constitute a single, the same, entity. Another single region is defined by all pixels outside of the root.

The pixel grid is the spatial grid on which the dynamical equations of protein concentrations are settled. For the images used we have 1 pixel  $\approx 0.5 \mu\text{m}$ . We assign the same dynamical equations and parameter values in all pixels within each labelled region. These equations and parameter values can be distinct between regions. Specifically, the equations applied on the cell wall are distinct to those within cells, as described in the next subsection. The diffusion coefficient of a protein within all pixels of the cell wall is the same. For simplicity, the diffusion coefficient of a protein is set to be the same in all the cell regions (i.e. within any cell), but distinct from that in the cell wall. The only differences settled between different cells are on the protein production terms. Further details on the construction and implementation of the model in the realistic root layouts can be found in the SI Text.

## 4.7 Mixed model in a realistic root layout

In the Mixed model, WOX5 activates BRAVO through the protein Z, which is repressed by BRAVO. WOX5 negatively regulates its own production [28]. Both WOX5 and BRAVO bind to form an immobile and inactive complex. WOX5 and Z diffuse inside cells and between cells. For simplicity, no diffusion for BRAVO inside cells is settled. The equations for the rate of change of the concentrations of each type of protein across space  $\vec{r}$  and time  $t$  are:

$$\frac{\partial B(\vec{r}, t)}{\partial t} = \alpha_0(\vec{r}) + \alpha(\vec{r}) \frac{Z(\vec{r}, t)^3}{k_B^3 + Z(\vec{r}, t)^3} - \lambda B(\vec{r}, t) W(\vec{r}, t) - d_B B(\vec{r}, t) \quad (13)$$

$$\frac{\partial Z(\vec{r}, t)}{\partial t} = \beta \left( \frac{W(\vec{r}, t)}{k_Z + W(\vec{r}, t)} \right) \left( \frac{1}{1 + cB(\vec{r}, t)} \right) - d_Z Z(\vec{r}, t) + \vec{\nabla} [D_Z^{cyt}(\vec{r}) \vec{\nabla} Z(\vec{r}, t)] \quad (14)$$

$$\frac{\partial W(\vec{r}, t)}{\partial t} = \gamma_{QC}(\vec{r}) \frac{k_W^3}{k_W^3 + W(\vec{r}, t)^3} - \lambda B(\vec{r}, t) W(\vec{r}, t) - d_W W(\vec{r}, t) + \vec{\nabla} [D_W^{cyt}(\vec{r}) \vec{\nabla} W(\vec{r}, t)] \quad (15)$$

The GFP proteins produced under the promoters of BRAVO ( $B_{GFP}$ ), of WOX5 ( $W_{GFP}$ ) and of Z ( $Z_{GFP}$ ) have the same production rate as BRAVO, WOX5 and Z, respectively. All these GFP proteins have the same diffusion coefficient and all degrade linearly with the same degradation rate (i.e. that of GFP,

$d_{GFP}$ ). Hence, the equations for the dynamics inside cells of these GFP proteins are:

$$\frac{\partial B_{GFP}(\vec{r}, t)}{\partial t} = \alpha_0(\vec{r}) + \alpha(\vec{r}) \frac{Z(\vec{r}, t)^3}{k_B^3 + Z(\vec{r}, t)^3} - d_{GFP} B_{GFP}(\vec{r}, t) + \vec{\nabla} [D_{GFP}^{cyt}(\vec{r}) \vec{\nabla} B_{GFP}(\vec{r}, t)] \quad (16)$$

$$\frac{\partial Z_{GFP}(\vec{r}, t)}{\partial t} = \beta \left( \frac{W(\vec{r}, t)}{k_Z + W(\vec{r}, t)} \right) \left( \frac{1}{1 + cB(x, t)} \right) - d_{GFP} Z_{GFP}(\vec{r}, t) + \vec{\nabla} [D_{GFP}^{cyt}(\vec{r}) \vec{\nabla} Z_{GFP}(\vec{r}, t)] \quad (17)$$

$$\frac{\partial W_{GFP}(\vec{r}, t)}{\partial t} = \gamma_{QC}(\vec{r}) \frac{k_W^3}{k_W^3 + W(\vec{r}, t)^3} - d_{GFP} W_{GFP}(\vec{r}, t) + \vec{\nabla} [D_{GFP}^{cyt}(\vec{r}) \vec{\nabla} W_{GFP}(\vec{r}, t)] \quad (18)$$

523 In these equations,  $\alpha(\vec{r})$  is the maximum strength of activation of BRAVO by Z, and is set to take  
 524 the value  $\alpha$  only in the cells shown in [Supplementary Figure 6](#), being zero in all the other cells and  
 525 regions. The threshold  $k_B$  controls the levels of Z necessary to activate BRAVO.  $\alpha_0(\vec{r})$  is the basal  
 526 production rate of BRAVO, and takes the value  $\alpha_0$  only in the pixels corresponding to the cells shown  
 527 in [Supplementary Figure 7](#) (being zero in all other regions). The factor Z is activated by WOX5 with  
 528 maximum rate  $\beta$ , and activation threshold  $k_Z$ . Parameter  $c$  sets the strength of the repression that  
 529 BRAVO does on Z.  $\gamma_{QC}(\vec{r})$  sets the maximal production of WOX5, and takes the value  $\gamma_{QC}$  only in the  
 530 regions corresponding to QC cells ([Supplementary Figure 6](#)), being zero in the remaining regions.  $K_W$   
 531 sets the WOX5 concentration threshold to feed negatively back on its own production. The formation  
 532 of the complex between BRAVO and WOX5, and the degradation of all factors are modelled as in  
 533 Sections 4.1, 4.2, 4.3. The diffusion coefficient for each species within cells is indicated by superscript  
 534 *cyt*. The diffusion terms take into account that across the whole root layout the diffusion coefficients  
 535 are not homogeneous, since they take one value inside cells (superscript *cyt*) and another value in the  
 536 cell walls (superscript *wall*).

We impose that inside cell walls only diffusion can happen whereas no reaction (production, degradation or binding), can occur, leading to the following equations :

$$\frac{\partial B(\vec{r}, t)}{\partial t} = 0 \quad (19)$$

$$\frac{\partial Z(\vec{r}, t)}{\partial t} = \vec{\nabla} [D_Z^{wall}(\vec{r}) \vec{\nabla} Z(\vec{r}, t)] \quad (20)$$

$$\frac{\partial W(\vec{r}, t)}{\partial t} = \vec{\nabla} [D_W^{wall}(\vec{r}) \vec{\nabla} W(\vec{r}, t)] \quad (21)$$

$$\frac{\partial B_{GFP}(\vec{r}, t)}{\partial t} = \vec{\nabla} [D_{GFP}^{wall}(\vec{r}) \vec{\nabla} B_{GFP}(\vec{r}, t)] \quad (22)$$

$$\frac{\partial Z_{GFP}(\vec{r}, t)}{\partial t} = \vec{\nabla} [D_{GFP}^{wall}(\vec{r}) \vec{\nabla} Z_{GFP}(\vec{r}, t)] \quad (23)$$

$$\frac{\partial W_{GFP}(\vec{r}, t)}{\partial t} = \vec{\nabla} [D_{GFP}^{wall}(\vec{r}) \vec{\nabla} W_{GFP}(\vec{r}, t)] \quad (24)$$

537 were the diffusion coefficient in the cell wall (denoted by superscript *wall*) is distinct to that inside cells.  
 538 In [Figure 5](#), *pBRAVO:GFP* corresponds to the variable  $B_{GFP}(\vec{r}, t)$  computed in the stationary state (i.e.  
 539 the activity of the BRAVO promoter as seen through its GFP reporter), while  $B(\vec{r}, t)$  represents the  
 540 BRAVO protein concentration, also computed in the stationary state. The analogous definitions for  
 541 WOX5 and Z are used in [Supplementary Figure 9](#).

542 All equations described up to this point correspond to the WT condition. To model the *bravo* mutant,  
 543 the same equations, with the same parameter values are used, but the BRAVO protein concentration is  
 544 set to zero (i.e. the mutant corresponds to Eqs. 14-18, 20-24 and  $B(\vec{r}, t) = 0$ ). Notice that to model this

545 mutant, the GFP reporter for BRAVO promoter,  $B_{GFP}$ , is described with the same equations as in the  
546 WT (i.e. with Eqs.(16,22)) and hence is not set to zero.

Figure 5 B and C show results of this same model (Eqs. 13, 15-24) except for the dynamics of Z within cells which, instead of Eq. (14), is set as:

$$\frac{\partial Z(\vec{r}, t)}{\partial t} = \beta \left( \frac{W(\vec{r}, t)}{k_Z + W(\vec{r}, t)} \right) - d_Z Z(\vec{r}, t) + \vec{\nabla} [D_Z^{cyt}(\vec{r}) \vec{\nabla} Z(\vec{r}, t)] \quad (25)$$

547 Notice that this is the same Eq.(14) except for the repression term by BRAVO, which here is not  
548 present. In addition, in Figure 5 B, Z does not diffuse and hence  $D_Z^{cyt} = 0$  and  $D_Z^{wall} = 0$ . In Figure 5D  
549 the equations of the Mixed model are used with  $\lambda = 0$ .

## 550 4.8 Numerical implementation of the mathematical models

551 To find the stationary distributions of the 1D models described in Sections 4.1, 4.2 and 4.3, we  
552 first reduce the system of differential equations to second order ordinary differential equations for  
553 the diffusible variables. To do this, we first set to zero the equation for the non-diffusible variables  
554 and substitute the result on the other equations. The remaining system can be cast as a boundary  
555 value problem which we solve numerically by using the *solve\_bvp* routine embedded in the Python-  
556 based *SciPy* library [48]. In all these calculations, we discretize the 1D Laplacian term as  $\frac{\partial^2 u(x)}{\partial x^2} =$   
557  $\frac{1}{\Delta x^2} (u_{i+1} + u_{i-1} - 2u_i)$ , being  $i$  an index such that  $x = i\Delta x$ , and use a spatial step size of  $\Delta x = 0.05$  a.u.,  
558 in a domain of  $x \in [-600, 600]$  a.u. We use a QC size of  $L_{QC} = 15$  a.u., and an equally long VI region.  
559 With this methodology, the explicit time-dependence of the variables is not computed, but only their  
560 stationary state. To double-check the validity of our solutions, we also simulated the whole temporal  
561 dynamics of the equations with a forward Euler method, obtaining the same stationary solutions as  
562 with the *solve\_bvp* method, thus confirming the results (data not shown).

563 To simulate the dynamics of the Mixed model (and its modifications) in the realistic root layout, we  
564 solve the corresponding reaction-diffusion equations with heterogeneous diffusion coefficients with a  
565 forward-time central-space scheme (FTCS) where time is discretized in steps of size  $\Delta t = 0.1$  a.u.,  
566 (so that after  $k$  steps,  $t_k = k\Delta t$ ) and space is discretized in steps of size  $(\Delta x = 1, \Delta y = 1)$  pixels, so  
567 that  $(x_i, y_i) = (i\Delta x, j\Delta y)$ , with a lattice size of  $(L_x, L_y) = (228, 448)$  pixels for WT root and  $(L_x, L_y) =$   
568  $(231, 448)$  pixels for *bravo* mutant root. For the images used, 1 pixel  $\approx 0.5 \mu\text{m}$ . We run the simulations  
569 up to  $t = 4000$  a.u., and take this time point as corresponding to the stationary state. All the diffusion  
570 coefficients outside the root layout are set to be zero, restricting the domain of the equations to the  
571 root's interior. Additionally, this condition automatically implements reflecting boundary conditions at  
572 the root borders.

## 573 5 Author contributions

574 JM and MI designed the research with the help of IBP, NB and AICD. JM and MI formulated the  
575 mathematical models. JM performed the numerical simulations. All authors analyzed the data. JM  
576 and MI wrote the manuscript with the help of IBP, NB and AICD.

## 577 **6 Acknowledgements**

578 M.I. and J.M. acknowledge support from grant PGC2018-101896-B-I00 funded by MCIN/AEI/ 10.13039/  
579 501100011033/FEDER “Una manera de hacer Europa”, and from the Generalitat de Catalunya through  
580 Grup de Recerca Consolidat 2017 SGR 1061. A.I.C-D. is a recipient of a BIO2016-78955 grant from  
581 the Spanish Ministry of Economy and Competitiveness and a European Research Council, ERC Con-  
582 solidator Grant (ERC-2015-CoG-683163). J.M. acknowledges BES-2016-078218 funded by MCIN/AEI  
583 /10.13039/501100011033 and FSE “El FSE invierte en tu futuro”. I.B-P. is funded by the FPU15/02822  
584 grant from the Spanish Ministry of Education, Culture and Sport; N.B. by the FI-DGR 2016FI-B 00472  
585 grant from the AGAUR, Generalitat de Catalunya; CRAG is funded by “Severo Ochoa Programme”  
586 from Centers of Excellence in R&D 2016-2019 (SEV-2015-485 0533).

## 587 **References**

- 588 [1] Robert Sablowski. **The dynamic plant stem cell niches.** *Current Opinion in Plant Biology*,  
589 10:639–644, 2007.
- 590 [2] David T. Scadden. **The stem-cell niche as an entity of action.** *Nature*, 441(7097):1075–1079,  
591 2006.
- 592 [3] Allan C. Spradling, Daniela Drummond-Barbosa, and Toshie Kai. **Stem cells find their niche.**  
593 *Nature*, 414:98–104, 2001.
- 594 [4] Robert Sablowski. **Plant and animal stem cells: conceptually similar, molecularly distinct?**  
595 *Trends in Cell Biology*, 14(11), 2004.
- 596 [5] T. Xie and A. C. Spradling. **decapentaplegic Is Essential for the Maintenance and Division of**  
597 **Germline Stem Cells in the *Drosophila* Ovary.** *Cell*, 94(2):251–260, 1998.
- 598 [6] Dahua Chen and Dennis McKearin. **Dpp Signaling Silences *bam* Transcription Directly to**  
599 **Establish Asymmetric Divisions of Germline Stem Cells.** *Current Biology*, 13(20):1786–1791,  
600 2003.
- 601 [7] Y. Zhang and D. Kalderon. **Hedgehog acts as a somatic stem cell factor in the *Drosophila***  
602 **ovary.** *Nature*, 410(6828):599–604, 2001.
- 603 [8] Young-Goo Han, Nathalie Spassky, Miriam Romaguera-Ros, Jose-Manuel Garcia-Verdugo, An-  
604 drea Aguilar, Sylvie Schneider-Maunoury, and Arturo Alvarez-Buylla. **Hedgehog signaling and**  
605 **primary cilia are required for the formation of adult neural stem cells.** *Nature Neuroscience*,  
606 11(3):277–284, 2008.
- 607 [9] Mitsuhiro Aida, Dimitris Beis, Renze Heidstra, Viola Willemsen, Ikram Blilou, Carla Galinha,  
608 Laurent Nussaume, Yoo-Sun Noh, Richard Amasino, and Ben Scheres. **The PLETHORA genes**  
609 **mediate patterning of the Arabidopsis root stem cell niche.** *Cell*, 119(1):109–120, 2004.
- 610 [10] Bruno Müller and Jen Sheen. **Cytokinin and auxin interaction in root stem-cell specification**  
611 **during early embryogenesis.** *Nature*, 458(7198):1094–1097, 2008.
- 612 [11] Zhaojun Ding and Jirí Friml. **Auxin regulates distal stem cell differentiation in Arabidopsis**  
613 **roots.** *Proceedings of the National Academy of Sciences*, 107(26):12046–12051, 2010.

- 614 [12] Ram Kishor Yadav, Mariano Perales, J r my Gruel, Thomas Girke, Henrik J nsson, and G Venu-  
615 gopala Reddy. **WUSCHEL protein movement mediates stem cell homeostasis in the *Ara-***  
616 ***bidopsis* shoot apex.** *Genes & Development*, 25(19):2025–2030, 2011.
- 617 [13] Ananda K. Sarkar, Marijn Luijten, Shunsuke Miyashima, Michael Lenhard, Takashi Hashimoto,  
618 Keiji Nakajima, Ben Scheres, Renze Heidstra, and Thomas Laux. **Conserved factors regulate**  
619 **signalling in *Arabidopsis thaliana* shoot and root stem cell organizers.** *Nature*, 446:811–814,  
620 2007.
- 621 [14] Claudia van den Berg, Viola Willemsen, Willem Hage, Peter Weisbeek, and Ben Scheres. **Cell**  
622 **fate in the *Arabidopsis* root meristem determined by directional signalling.** *Nature*, 378:62–  
623 65, 1995.
- 624 [15] Catherine Kidner, Venkatesan Sundaresan, Keith Roberts, and Liam Dolan. **Clonal analysis**  
625 **of the *Arabidopsis* root confirms that position, not lineage, determines cell fate.** *Planta*,  
626 211:191–199, 2000.
- 627 [16] Akie Shimotohno, Renze Heidstra, Ikram Blilou, and Ben Scheres. **Root stem cell niche or-**  
628 **ganizer specification by molecular convergence of PLETHORA and SCARECROW tran-**  
629 **scription factor modules.** *Genes & Development*, 32:1085–1100, 2018.
- 630 [17] Giovanni Sena, Xiaoning Wang, Hsiao-Yun Liu, Hugo Hofhuis, and Kenneth D. Birnbaum. **Or-**  
631 **gan regeneration does not require a functional stem cell niche in plants.** *Nature*, 457:1150–  
632 1153, 2009.
- 633 [18] L Dolan, K Janmaat, V Willemsen, P Linstead, S Poethig, K Roberts, and B Scheres. **Cellular**  
634 **organisation of the *Arabidopsis thaliana* root.** *Development*, 119(1):71–84, 1993.
- 635 [19] Claudia van den Berg, Viola Willemsen, Giel Hendriks, Peter Weisbeek, and Ben Scheres. **Short-**  
636 **range control of cell differentiation in the *Arabidopsis* root meristem.** *Nature*, 390:287–289,  
637 1997.
- 638 [20] Yuting Liu, Meizhi Xu, Nengsong Liang, Yanghang Zheng, Qiaozhi Yu, and Shuang Wu. **Sym-**  
639 **plastic communication spatially directs local auxin biosynthesis to maintain root stem cell**  
640 **niche in *Arabidopsis*.** *Proceedings of the National Academy of Sciences*, 114(15):4005–4010,  
641 2017.
- 642 [21] Limin Pi, Ernst Aichinger, Eric van der Graaff, Cristina I. Llavata-Peris, Dolf Weijers, Lars Hen-  
643 nig, Edwin Groot, and Thomas Laux. **Organizer-Derived WOX5 Signal Maintains Root Col-**  
644 **umella Stem Cells through Chromatin-Mediated Repression of CDF4 Expression.** *Develop-*  
645 *mental Cell*, 33:576–588, 2015.
- 646 [22] Barbara Berckmans, Gwendolyn Kirschner, Nadja Gerlitz, Ruth Stadler, and R diger Simon. **CLE40**  
647 **Signaling Regulates Root Stem Cell Fate.** *Plant Physiology*, 182:1776–1792, 2020.
- 648 [23] Natalie M. Clark, Adam P. Fisher, Barbara Berckmans, Lisa Van den Broeck, Emily C. Nelson,  
649 Thomas T. Nguyen, Estefano Bustillo-Avenida o, Sophia G. Zebell, Miguel A. Moreno-Risue o,  
650 R diger Simon, Kimberly L. Gallagher, and Rosangela Sozzani. **Protein complex stoichiometry**  
651 **and expression dynamics of transcription factors modulate stem cell division.** *Proceedings*  
652 *of the National Academy of Sciences*, 117(26):15332–15342, 2020.

- 653 [24] Ben Scheres. **Stem-cell niches: nursery rhymes across kingdoms** . *Nature Reviews Molecular*  
654 *Cell Biology*, 8(5):345–354, 2007.
- 655 [25] Ramin Rahni, Idan Efroni, and Kenneth D Birnbaum. **A Case for Distributed Control of Local**  
656 **Stem Cell Behavior in Plants**. *Developmental Cell*, 38(6):635–642, 2016.
- 657 [26] Rotem Matosevich and Idan Efroni. **The Quiescent Center and Root Regeneration** . *Journal*  
658 *of Experimental Botany*, erab319, 2021.
- 659 [27] Josep Vilarrasa-Blasi, Mary-Paz González-García, David Frigola, Norma Fàbregas, Konstanti-  
660 nos G. Alexiou, Nuria López-Bigas, Susana Rivas, Alain Jauneau, Jan U. Lohmann, Philip N.  
661 Benfey, Marta Ibañes, and Ana I. Caño-Delgado. **Regulation of Plant Stem Cell Quiescence by**  
662 **a Brassinosteroid Signaling Module**. *Developmental Cell*, 30:36–47, 2014.
- 663 [28] Isabel Betegón-Putze, Josep Mercadal, Nadja Bosch, Ainoa Planas-Riverola, Mar Marquès-  
664 Bueno, Josep Vilarrasa-Blasi, David Frigola, Rebecca Corinna Burkart, Cristina Martínez, Ana  
665 Conesa, Rosangela Sozzani, Yvonne Stahl, Salomé Prat, Marta Ibañes, and Ana I. Caño-Delgado.  
666 **Precise transcriptional control of cellular quiescence by BRAVO/WOX5 complex in Ara-**  
667 **bidopsis roots**. *Molecular Systems Biology*, 17:e9864, 2021.
- 668 [29] Celine Forzani, Ernst Aichinger, Emily Sornay, Viola Willemsen, Thomas Laux, Walter Dewitte,  
669 and James A H Murray. **WOX5 Suppresses CYCLIN D Activity to Establish Quiescence at**  
670 **the Center of the Root Stem Cell Niche**. *Current Biology*, 24:1939–1944, 2014.
- 671 [30] The Arabidopsis Information Resource (TAIR). [https://www.arabidopsis.org/  
672 servlets/TairObject?type=aa\\_sequence&id=1009128733](https://www.arabidopsis.org/servlets/TairObject?type=aa_sequence&id=1009128733). 2017.
- 673 [31] Yeonggil Rim, Lijun Huang, Hyosub Chu, Xiao Han, Won Kyong Cho, Che Ok Jeon, Hye Jin  
674 Kim, Jong-Chan Hong, William J. Lucas, and Jae-Yean Kim. **Analysis of Arabidopsis Tran-**  
675 **scription Factor Families Revealed Extensive Capacity for Cell-to-Cell Movement as Well**  
676 **as Discrete Trafficking Patterns**. *Molecules and Cells*, 32(6):519–526, 2011.
- 677 [32] Natalie M Clark, Eli Buckner, Adam P Fisher, Emily C Nelson, Thomas T Nguyen, Abigail R  
678 Simmons, Maria A de Luis Balaguer, Tiara Butler-Smith, Parnell J Sheldon, Dominique C  
679 Bergmann, Cranos M Williams, and Rosangela Sozzani. **Stem-cell-ubiquitous genes spatiotem-**  
680 **porally coordinate division through regulation of stem-cell-specific gene networks**. *Nature*  
681 *Communications*, 10(1):5574, 2019.
- 682 [33] Yun Zhou, An Yan, Han Han, Ting Li, Yuan Geng, Xing Liu, and Elliot M Meyerowitz. **HAIRY**  
683 **MERISTEM with WUSCHEL confines CLAVATA3 expression to the outer apical meristem**  
684 **layers**. *Science*, 361(6401):502–506, 2018.
- 685 [34] Fernando Bejarano, Lidia Pérez, Yiorgos Apidianakis, Christos Delidakis, and Marco Milán.  
686 **Hedgehog restricts its expression domain in the Drosophila wing**. *EMBO Reports*, 8(8):778–  
687 783, 2007.
- 688 [35] Avigdor Eldar, Dalia Rosin, Ben-Zion Shilo, and Naama Barkai. **Self-Enhanced Ligand Degrada-**  
689 **tion Underlies Robustness of Morphogen Gradients**. *Developmental Cell*, 5:635–646, 2003.
- 690 [36] Ben-Zion Shilo and Naama Barkai. **Buffering Global Variability of Morphogen Gradients**.  
691 *Developmental Cell*, 40(5):429–438, 2016.

- 692 [37] Verônica A. Grieneisen, Jian Xu, Athanasius F. M. Marée, Paulien Hogeweg, and Ben Scheres.  
693 **Auxin transport is sufficient to generate a maximum and gradient guiding root growth.**  
694 *Nature*, 449(25):1008–1013, 2007.
- 695 [38] Huiyu Tian, Krzysztof Wabnick, Tiantian Niu, Hanbing Li, Qianqian Yu, Stephan Pollmann,  
696 Steffen Vanneste, Willy Govaerts, Jakub Rolcık, Markus Geisler, Jirı́ Friml, and Zhaojun Ding.  
697 **WOX5-IAA17 feedback circuit-mediated cellular auxin response is crucial for the pattern-**  
698 **ing of root stem cell niches in *Arabidopsis*.** *Molecular Plant*, 7(2):277–289, 2014.
- 699 [39] Henrik Jönsson, Marcus Heisler, G. Venugopala Reddy, Vikas Agrawal, Victoria Gor, Bruce E.  
700 Shapiro, Eric Mjolsness, and Elliot M. Meyerowitz. **Modeling the organization of the**  
701 **WUSCHEL expression domain in the shoot apical meristem.** *Bioinformatics*, 21(1):i232–  
702 i240, 2005.
- 703 [40] Ute Voß, Anthony Bishopp, Etienne Farcot, and Malcolm J. Bennett. **Modelling hormonal**  
704 **response and development.** *Trends in Plant Science*, 19(5):311–319, 2014.
- 705 [41] Junli Liu, Simon Moore, Chunli Chen, and Keith Lindsey. **Crosstalk Complexities between**  
706 **Auxin, Cytokinin, and Ethylene in *Arabidopsis* Root Development: From Experiments to**  
707 **Systems Modeling, and Back Again.** *Molecular Plant*, 10(12):1480–1496, 2017.
- 708 [42] José R. Dinneny and Philip N. Benfey. **Plant Stem Cell Niches: Standing the Test of Time.**  
709 *Cell*, 132(4):553–557, 2008.
- 710 [43] Richard K. Grosberg and Richard R. Strathmann. **The Evolution of Multicellularity: A Minor**  
711 **Major Transition?** *Annual Review of Ecology, Evolution, and Systematics*, 38:621–654, 2007.
- 712 [44] Andrew H. Knoll. **The Multiple Origins of Complex Multicellularity.** *Annual Review of Earth*  
713 *and Planetary Sciences*, 39:217–239, 2011.
- 714 [45] Kaoru Yoshiyamaa, Phillip A. Conklina, Neil D. Huefner, and Anne B. Britt. **Suppressor of**  
715 **gamma response 1 (SOG1) encodes a putative transcription factor governing multiple re-**  
716 **sponses to DNA damage.** *Proceedings of the National Academy of Sciences*, 106(31):12843–  
717 12848, 2009.
- 718 [46] Vincent L. Cannataro, Scott A McKinley, and Colette M. St. Mary. **The evolutionary trade-off**  
719 **between stem cell niche size, aging, and tumorigenesis.** *Evolutionary Applications*, 10(6):590–  
720 602, 2017.
- 721 [47] Stéfan van der Walt, Johannes L. Schönberger, Juan Nunez-Iglesias, François Boulogne,  
722 Joshua D. Warner, Neil Yager, Emmanuelle Goullart, Tony Yu, and the *scikit-image* contribu-  
723 tors. ***scikit-image*: Image processing in Python.** *PeerJ*, 2(e453):[https://doi.org/10.](https://doi.org/10.7717/peerj.453)  
724 [7717/peerj.453](https://doi.org/10.7717/peerj.453), 2014.
- 725 [48] Pauli Virtanen and SciPy 1.0 Contributors. **SciPy 1.0: fundamental algorithms for scientific**  
726 **computing in Python.** *Nature Methods*, 17(13):261–272, 2020.
- 727 [49] Jordan Lee. **Stability of Finite Difference Schemes on the Diffusion Equation with Dis-**  
728 **continuous Coefficients.** [https://math.mit.edu/research/highschool/rsi/](https://math.mit.edu/research/highschool/rsi/documents/2017Lee.pdf)  
729 [documents/2017Lee.pdf](https://math.mit.edu/research/highschool/rsi/documents/2017Lee.pdf), 2017.



# 730 **Self-confined expression in the *Arabidopsis* root stem cell niche:** 731 **Supplementary Information Text**

732 Josep Mercadal, Isabel Betegón-Putze, Nadja Bosch, Ana I. Caño-Delgado, Marta Ibañes

## 733 **Table of contents:**

### 734 1 Derivation of the models

#### 735 1.1 Stationary profile of WOX5 in the immobilization by sequestration model

### 737 2 Immobilization by sequestration with an additional sequestrator

### 739 3 Simulations in a realistic root layout

#### 740 3.1 Space discretization for diffusion with heterogeneous coefficients

#### 741 3.2 Reaction-diffusion model with only WOX5

## 742 **1 Derivation of the models**

743 The equations used in all models come from an approximation where complex for-  
744 mation and mRNA dynamics is very fast compared to the dynamics of proteins. We  
745 exemplify this approximation with the immobilization by sequestration mechanism,  
746 but the same procedure has been applied to obtain the set of equations of all the other  
747 models.

748 By explicitly considering the mRNA of BRAVO ( $m_B$ ) and WOX5 ( $m_W$ ), and the com-  
749 plex formed by the binding of BRAVO and WOX5 proteins ( $C$ ), the model equations  
750 for all these variables and for BRAVO ( $B$ ) and WOX5 ( $W$ ) proteins in the immobi-  
751 lization by sequestration mechanism are:

$$\frac{\partial m_B(x,t)}{\partial t} = a_B W(x,t) - \delta_B m_B(x,t) \quad (26)$$

$$\frac{\partial m_W(x,t)}{\partial t} = a_W^{QC}(x) - \delta_W m_W(x,t) \quad (27)$$

$$\frac{\partial B(x,t)}{\partial t} = \alpha_B m_B(x,t) - \mu B(x,t)W(x,t) + \nu C(x,t) - d_B B(x,t) \quad (28)$$

$$\frac{\partial W(x,t)}{\partial t} = \gamma_W m_W(x,t) - \mu B(x,t)W(x,t) + \nu C(x,t) - d_W W(x,t) + D_W \frac{\partial^2 W(x,t)}{\partial x^2} \quad (29)$$

$$\frac{\partial C(x,t)}{\partial t} = \mu B(x,t)W(x,t) - \nu C(x,t) - d_C C(x,t) \quad (30)$$

752 where  $a_B$ ,  $a_W^{QC}(x)$ ,  $\delta_B$ ,  $\delta_W$  are the mRNA synthesis and degradation rates of BRAVO  
753 and WOX5 mRNAs, respectively. The superscript and explicit spatial dependence in  
754  $a_W^{QC}(x)$  indicates that the mRNA of WOX5 is only produced in the QC region.  $\alpha_B$  and  
755  $\gamma_W$  represent the rates of mRNA translation into BRAVO and WOX5 proteins, respec-  
756 tively, and  $\mu$  and  $\nu$  are the rates of protein-protein binding and unbinding. Finally,  
757 the complex can be degraded with rate  $d_C$ . The rest of the parameters have already  
758 been defined in [Methods](#). If the dynamics of the mRNAs and of complex formation  
759 are very fast (by setting their corresponding time derivatives to zero), we obtain:

$$m_B(x) = \frac{a_B W(x)}{\delta_B}, \quad m_W(x) = \frac{a_W^{QC}(x)}{\delta_W}, \quad C(x) = \frac{\mu B(x)W(x)}{\nu + d_C} \quad (31)$$

Substituting these relations to the equations for  $B$  and  $W$ , it results into:

$$\frac{\partial B(x,t)}{\partial t} = \frac{\alpha_B a_B}{\delta_B} W(x,t) - \left( \mu + \frac{\nu \mu}{\nu + d_C} \right) B(x,t)W(x,t) - d_B B(x,t) \quad (32)$$

$$\frac{\partial W(x,t)}{\partial t} = \frac{\gamma_W a_W^{QC}(x)}{\delta_W} - \left( \mu + \frac{\nu \mu}{\nu + d_C} \right) B(x,t)W(x,t) - d_W W(x,t) + D_W \frac{\partial^2 W(x,t)}{\partial x^2} \quad (33)$$

760 These are the equations of the immobilization by sequestration model used in the  
761 main text (Eq. 1 and 2) when the following definitions of parameters are applied:

$$762 \alpha \equiv \frac{\alpha_B a_B}{\delta_B}, \quad \gamma_{QC}(x) \equiv \frac{\gamma_W a_W^{QC}(x)}{\delta_W} \quad \text{and} \quad \lambda \equiv \mu + \frac{\nu \mu}{\nu + d_C}.$$

763 Notice that since we only analyse the stationary state of the system, these quasi-steady  
764 state approximations do not affect the final result of the spatial profiles.

## 765 1.1 Stationary profile of WOX5 in the immobilization by sequestration model

766 In the stationary state, the previous equations (32) and (33) of the immobilization by  
767 sequestration model can be reduced to the following second order ODE:

$$D_W \frac{d^2 W(x)}{dx^2} = -\gamma_{QC}(x) + W(x) \left( \frac{\lambda \alpha}{\lambda W(x) + d_B} + d_W \right) \quad (34)$$

768 and the BRAVO profile is  $B(x) = \frac{\lambda \alpha}{\lambda W(x) + d_B}$ . This ODE can be interpreted as a dif-  
769 fusing molecule  $W$  produced at a source  $\gamma_{QC}(x)$ , with a *nonlinear* higher degradation  
770 rate, given by

$$d'_W[W(x)] \equiv d_W + \frac{\lambda \alpha}{\lambda W(x) + d_B} \quad (35)$$

771 where the second term comes from the binding between BRAVO and WOX5. This  
772 non-linear degradation implies that in the immobilization by sequestration model and  
773 outside the source region, the stationary spatial profile of  $W(x)$  in the WT is not  
774 exponential, but decays spatially more abruptly. In contrast, when modeling the *bravo*  
775 mutant, the same ODE applies but with a linear degradation,  $d'_W[W(x)] = d_W$  and  
776 hence the profile of  $W(x)$  outside the source region is exponential in this mutant.

## 777 2 Immobilization by sequestration with an additional sequestra- 778 tor

779 In [Supplementary Figure 2](#) we show the effect of an additional protein (hereafter  
780 named sequestrator,  $S$ ) which can bind BRAVO and WOX5 separately. The equations  
781 corresponding to this model are:

$$\frac{\partial B(x,t)}{\partial t} = \alpha W(x,t) - \lambda B(x,t)W(x,t) - \lambda_{BS}B(x,t)S(x,t) - d_B B(x,t) \quad (36)$$

$$\frac{\partial W(x,t)}{\partial t} = \gamma_{QC}(x) - \lambda B(x,t)W(x,t) - \lambda_{WS}W(x,t)S(x,t) - d_W W(x,t) + D_W \frac{\partial^2 W(x,t)}{\partial x^2} \quad (37)$$

$$\frac{\partial S(x,t)}{\partial t} = \alpha_S - \lambda_{BS}B(x,t)S(x,t) - \lambda_{WS}W(x,t)S(x,t) - d_S S(x,t) \quad (38)$$

782 where  $S(x,t)$  is the concentration of the protein  $S$  across space and time, the new  
783 parameters  $\alpha_S$  and  $d_S$  represent the production and degradation of  $S$  proteins, and  $\lambda_{BS}$ ,

784  $\lambda_{WS}$  denote the complex formation rates between  $S$  and BRAVO and  $S$  and WOX5,  
785 respectively.

### 786 3 Simulations in a realistic root layout

#### 787 3.1 Space discretization for diffusion with heterogeneous coefficients

788 In the realistic root layout, we simulate a reaction-diffusion equation with non-homogeneous  
789 diffusion coefficients, that is, diffusion is explicitly dependent on space. In our case,  
790 the value of these coefficients depend on whether the spatial position corresponds to  
791 the interior of a cell or to the cell wall, with respective diffusion coefficients of  $D^{cyt}$   
792 and  $D^{wall}$ . These can be encompassed into a single, spatially-dependent coefficient  
793  $D(x, y)$ , where  $x, y$  carry the information of the positions within the root layout:

794  $D(x, y) = D^{cyt}$  for  $x, y \in \text{cells}$  and  $D(x, y) = D^{wall}$  for  $x, y \in \text{cell wall}$ .

Then, for a given variable  $u(x, y)$  (i.e. the concentration of one of the proteins), we discretize the spatial term  $\vec{\nabla}(D(x, y)\vec{\nabla}u(x, y))$  as done in [49], namely:

$$\vec{\nabla}(D_{ij}\vec{\nabla}u_{ij}) = \frac{1}{\Delta x^2} \left( \frac{1}{2}(D_{ij} + D_{i+1,j})(u_{i+1,j} - u_{ij}) - \frac{1}{2}(D_{ij} + D_{i-1,j})(u_{ij} - u_{i-1,j}) \right) +$$

$$+ \frac{1}{\Delta y^2} \left( \frac{1}{2}(D_{ij} + D_{i,j+1})(u_{i,j+1} - u_{ij}) - \frac{1}{2}(D_{ij} + D_{i,j-1})(u_{ij} - u_{i,j-1}) \right)$$

795 where  $D_{ij} = D(x = i\Delta x, y = j\Delta y)$  and  $u_{ij} = u(x = i\Delta x, y = j\Delta y)$ . Thus the values of  
796 indexes  $i, j$  specify the value of the diffusion coefficient, whether it is  $D^{cyt}$  or  $D^{wall}$ .

#### 797 3.2 Reaction-diffusion model with only WOX5

798 **Supplementary Figure 8** shows the stationary results when WOX5 is produced only  
799 at QC cells, degrades and diffuses, in the absence of any other regulation. In this  
800 case only the dynamics for WOX5 and the GFP reporter its promoter are simulated,  
801 according to the following equations inside the cells:

$$\frac{\partial W(x, t)}{\partial t} = \gamma_{QC}(x) - d_W W(x, t) + \vec{\nabla} [D_W^{cyt}(x) \vec{\nabla} W(x, t)] \quad (39)$$

$$\frac{\partial W_{GFP}(x, t)}{\partial t} = \gamma_{QC}(x) - d_{GFP} W_{GFP}(x, t) + \vec{\nabla} [D_{GFP}^{cyt}(x) \vec{\nabla} W_{GFP}(x, t)] \quad (40)$$

803 and in the cell wall:

$$\frac{\partial W(x, t)}{\partial t} = \vec{\nabla} [D_W^{wall}(x) \vec{\nabla} W(x, t)] \quad (41)$$

804

$$\frac{\partial W_{GFP}(x,t)}{\partial t} = \vec{\nabla} [D_{GFP}^{wall}(x) \vec{\nabla} W_{GFP}(x,t)] \quad (42)$$

805 Notice that for these variables, these are the same equations as those of the Mixed  
806 model but with  $\lambda = 0$ .

807 **Supplementary Figures**

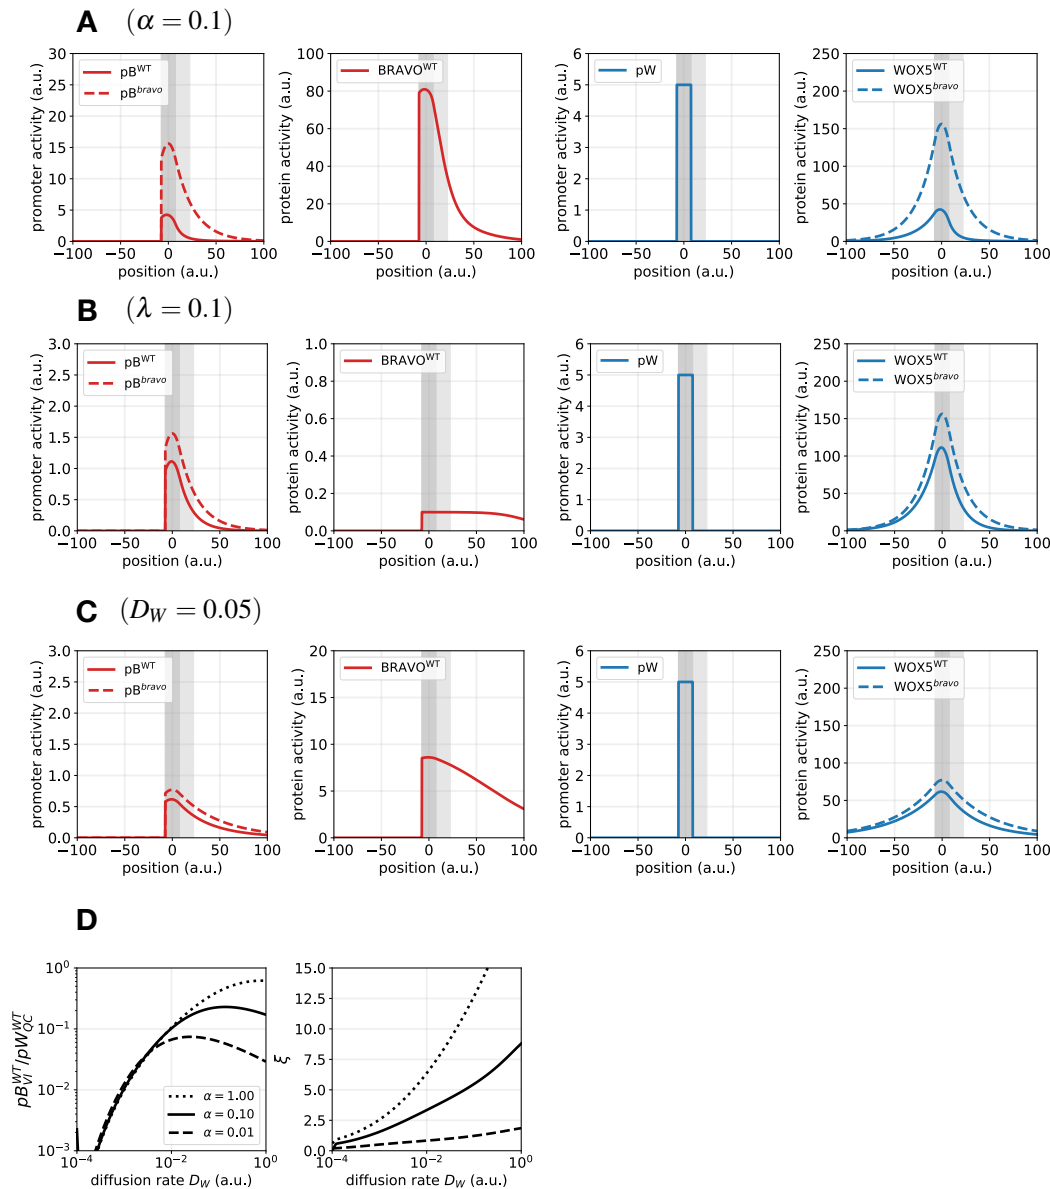

**Figure 6: Supp. Fig. 1. Results of the Immobilization by sequestration model for different parameter values.** Stationary profiles of  $pB(x)$ ,  $B(x)$ ,  $pW(x)$  and  $W(x)$  in WT (continuous lines) and in the *bravo* mutant (dashed lines), for the same parameter values as in Figure 2 except for one: **A**)  $\alpha = 0.1$ , **B**)  $\lambda = 0.1$  and **C**)  $D_W = 0.05$ . Accordingly, results in A, B and C, when compared to Figure 2, depict the effect of (A) higher BRAVO production, (B) stronger binding or (C) higher WOX5 diffusion. **A**) For this higher production rate,  $pB$  in the WT is mostly at the QC (with similar levels to  $pW$ ) and nearly absent in the VI. This strong confinement is not compatible with real expressions in Arabidopsis roots. **B**) This higher complex formation rate has a strong impact on the levels of free BRAVO, which are very small due to higher sequestration by WOX5. **C**) For this higher WOX5 diffusion coefficient, WOX5 is at high concentration across a very broad region above the VI. Consequently  $pB(x)$  is also very spanned, which is not realistic when compared to expressions in Arabidopsis roots.  $pB$  value at the QC is lower than in Figure 2. **D**) The effect of WOX5 diffusion coefficient on the quantities  $pB_{VI}^{WT} / pB_{QC}^{WT}$  and  $\xi$ , for different values of  $\alpha$ . A non-zero value of WOX5 diffusion is needed to induce an expansion of  $pB(x)$  in the *bravo* mutant. Yet, too large diffusion coefficients reduce the level of  $pB$  expression at the VI and QC.

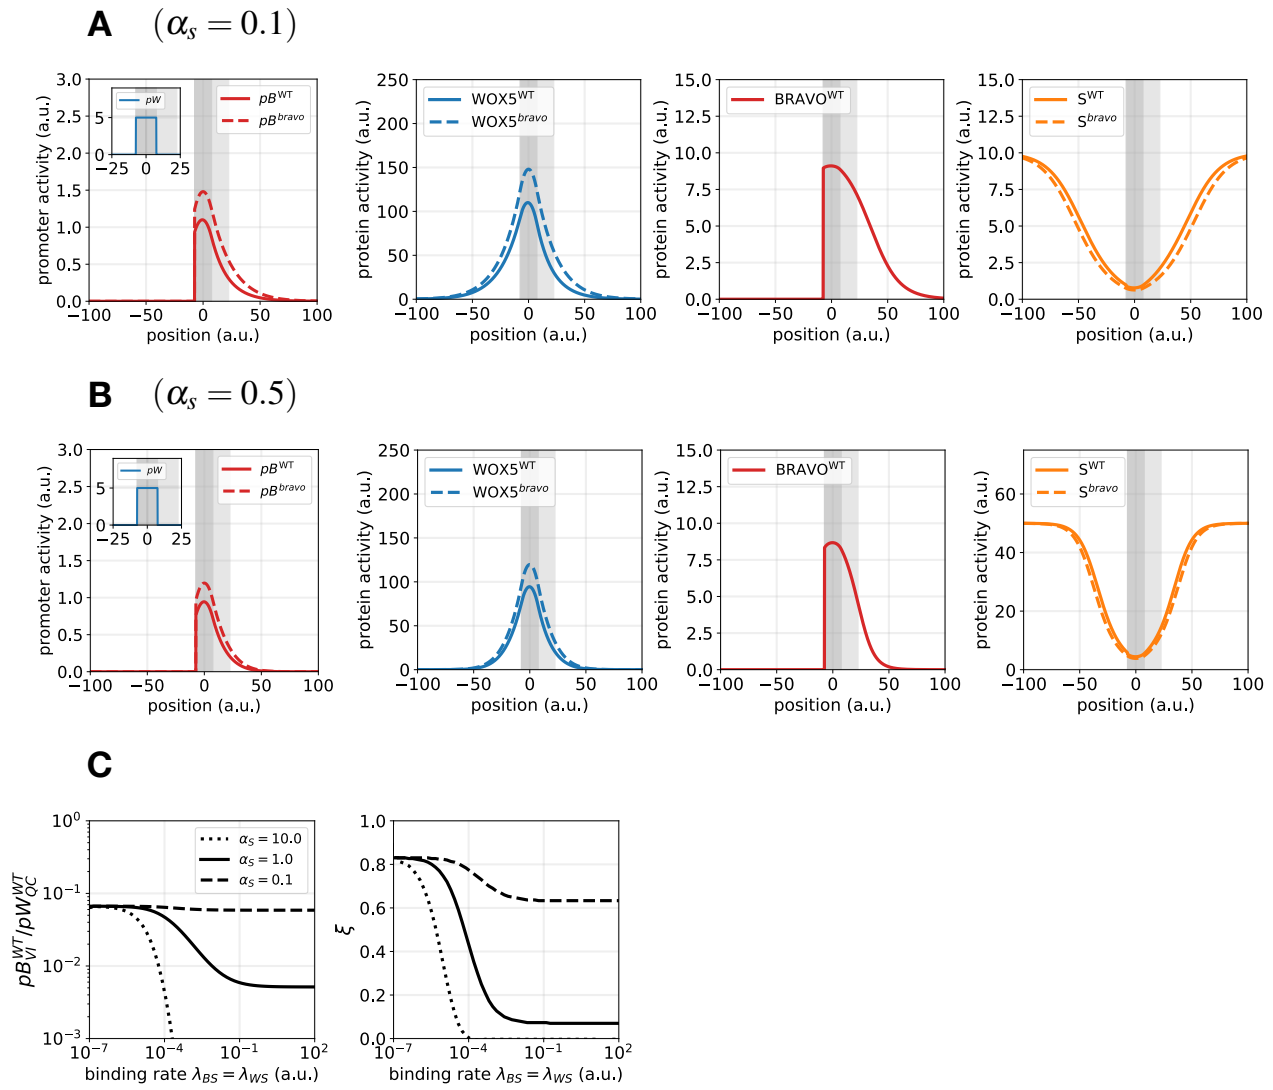

**Figure 7: Supp. Fig. 2. Immobilization by sequestration model with an additional sequestrator S.** All common parameter values as in Figure 2. **A,B)** Stationary profiles of  $pB(x)$ ,  $B(x)$ ,  $pW(x)$ ,  $W(x)$  and  $S(x)$  for two different values of the production of the additional sequestrator (A)  $\alpha_S = 0.1$  and (B)  $\alpha_S = 0.5$ . The rates of binding between S and BRAVO and between S and WOX5 are the same as that between BRAVO and WOX5,  $\lambda_{BS} = \lambda_{WS} = \lambda_{WB} =$ . **C)**  $pB_{VI}^{WT}/pW_{QC}^{WT}$  and  $\xi$  as a function of the binding rates  $\lambda_{BS} = \lambda_{WS}$ , for three different  $\alpha_S$  values. An increase in  $\alpha_S$ ,  $\lambda_{BS}$  and  $\lambda_{WS}$  values weakens  $pB(x)$  expansion. The other parameter values of S dynamics are detailed in Table 2.

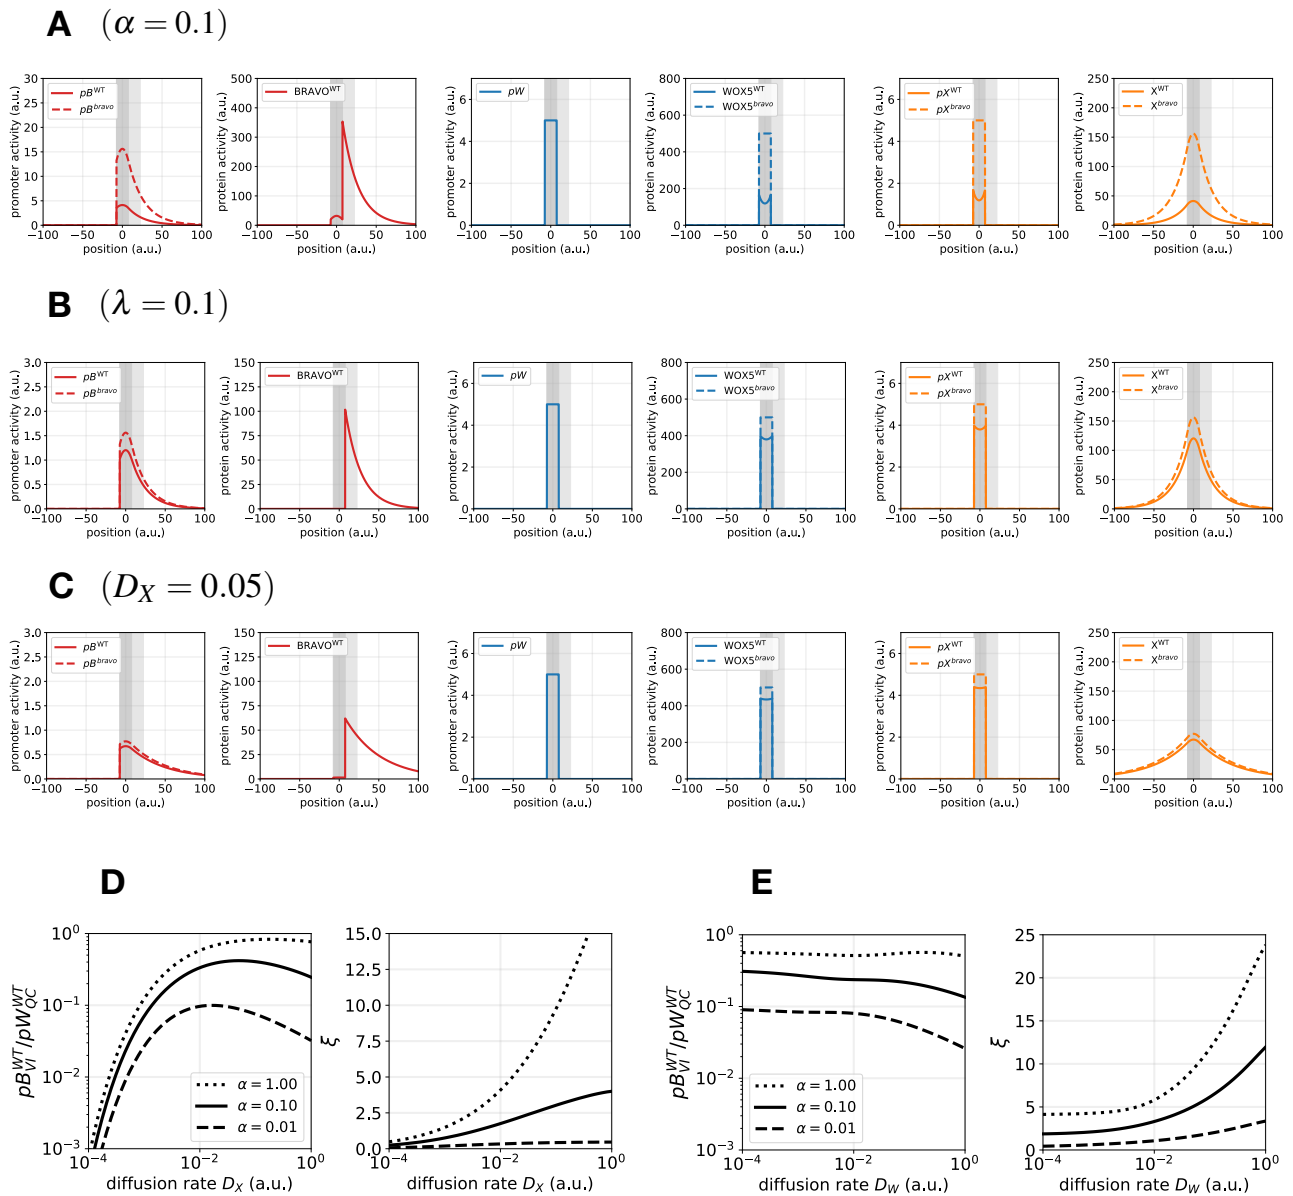

**Figure 8: Supp. Fig. 3. Results of the Attenuation by sequestration model for different parameter values.** Stationary profiles of  $pB(x)$ ,  $B(x)$ ,  $pW(x)$ ,  $W(x)$ ,  $pX(x)$  and  $X(x)$  in WT (continuous lines) and in the *bravo* mutant (dashed lines), for the same parameter values as in Figure 3 except for one: **A**)  $\alpha = 0.1$ , **B**)  $\lambda = 0.1$  and **C**)  $D_X = 0.05$ . Accordingly, results in A, B and C, when compared to Figure 3, depict the effect of (A) higher BRAVO production, (B) stronger binding or (C) higher  $X$  diffusion. **A**) For this higher production rate,  $pB$  in the WT at the QC has similar levels to  $pW$ , a situation which is not compatible with real expressions in Arabidopsis roots. The bump in the profile of  $B(x)$  is a direct consequence of sequestration only happening in the QC, as in this model WOX5 does not diffuse. **B**) For this higher complex formation rate, BRAVO is nearly absent from the QC, being all sequestered by WOX5. The profiles of  $pB(x)$  are very similar to the ones in Figure 3. **C**) For this higher  $X$  diffusion coefficient,  $pB(x)$  is very spanned above the VI, which is not realistic when compared to expressions in Arabidopsis roots.  $pB$  value at the QC is lower than in Figure 3. **D**) Effect of  $X$  diffusion coefficient on the quantities  $pB_{VI}^{WT}/pW_{QC}^{WT}$  and  $\xi$ , for different values of  $\alpha$ . In panels A-D there is no diffusion of WOX5. **E**) Effect of WOX5 diffusion coefficient on the quantities  $pB_{VI}^{WT}/pW_{QC}^{WT}$  and  $\xi$ , for different values of  $\alpha$ . The diffusion of WOX5 promotes expansion of  $pB(x)$  in the *bravo* mutant but drives fainter  $pB$  values at the VI (and QC) in the WT.



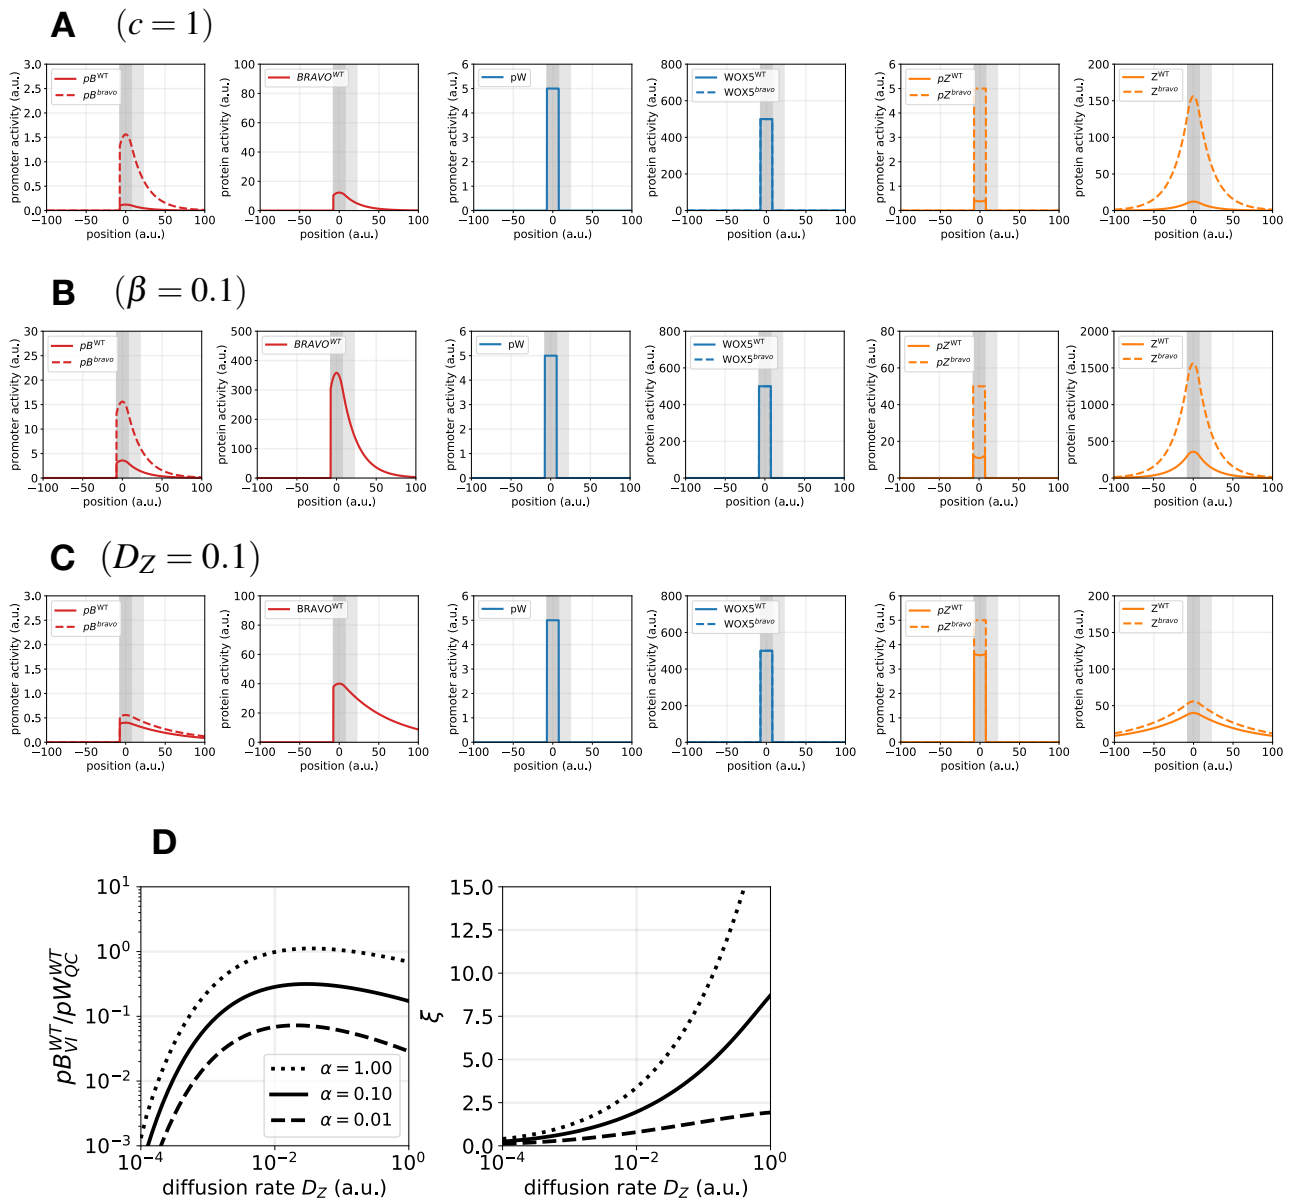

**Figure 9: Supp. Fig. 4. Results of the Repression model for different parameter values.** Stationary profiles of  $pB(x)$ ,  $B(x)$ ,  $pW(x)$ ,  $W(x)$ ,  $pZ(x)$  and  $Z(x)$  in WT (continuous lines) and in the *bravo* mutant (dashed lines), for the same parameter values as in Figure 4 except for one: **A**)  $c = 1$ , **B**)  $\beta = 0.1$  and **C**)  $D_Z = 0.1$ . Accordingly, results in A, B and C, when compared to Figure 4, depict the effect of (A) higher repression strength, (B) higher production rate of Z or (C) higher Z diffusion. **A**) For this higher repression strength,  $pB$  in the WT is very low, and increases and spans very dramatically in the *bravo* mutant, which is not compatible with experimental data (Figure 1, [28]). **B**) For this higher production rate of Z,  $pB$  in the WT is very high, and increases very dramatically in the *bravo* mutant, which is not compatible with experimental data. **C**) For this higher Z diffusion coefficient,  $pB(x)$  is very spanned above the VI, which is not realistic when compared to expressions in Arabidopsis roots.  $pB$  value at the QC is lower than in Figure 3. **D**) Effect of Z diffusion coefficient on the quantities  $pB_{VI}^{WT}/pB_{QC}^{WT}$  and  $\xi$ , for different values of  $\alpha$ . Strong diffusion of Z promotes expansion of  $pB(x)$  in the *bravo* mutant but drives fainter  $pB$  values at the VI (and QC) in the WT.

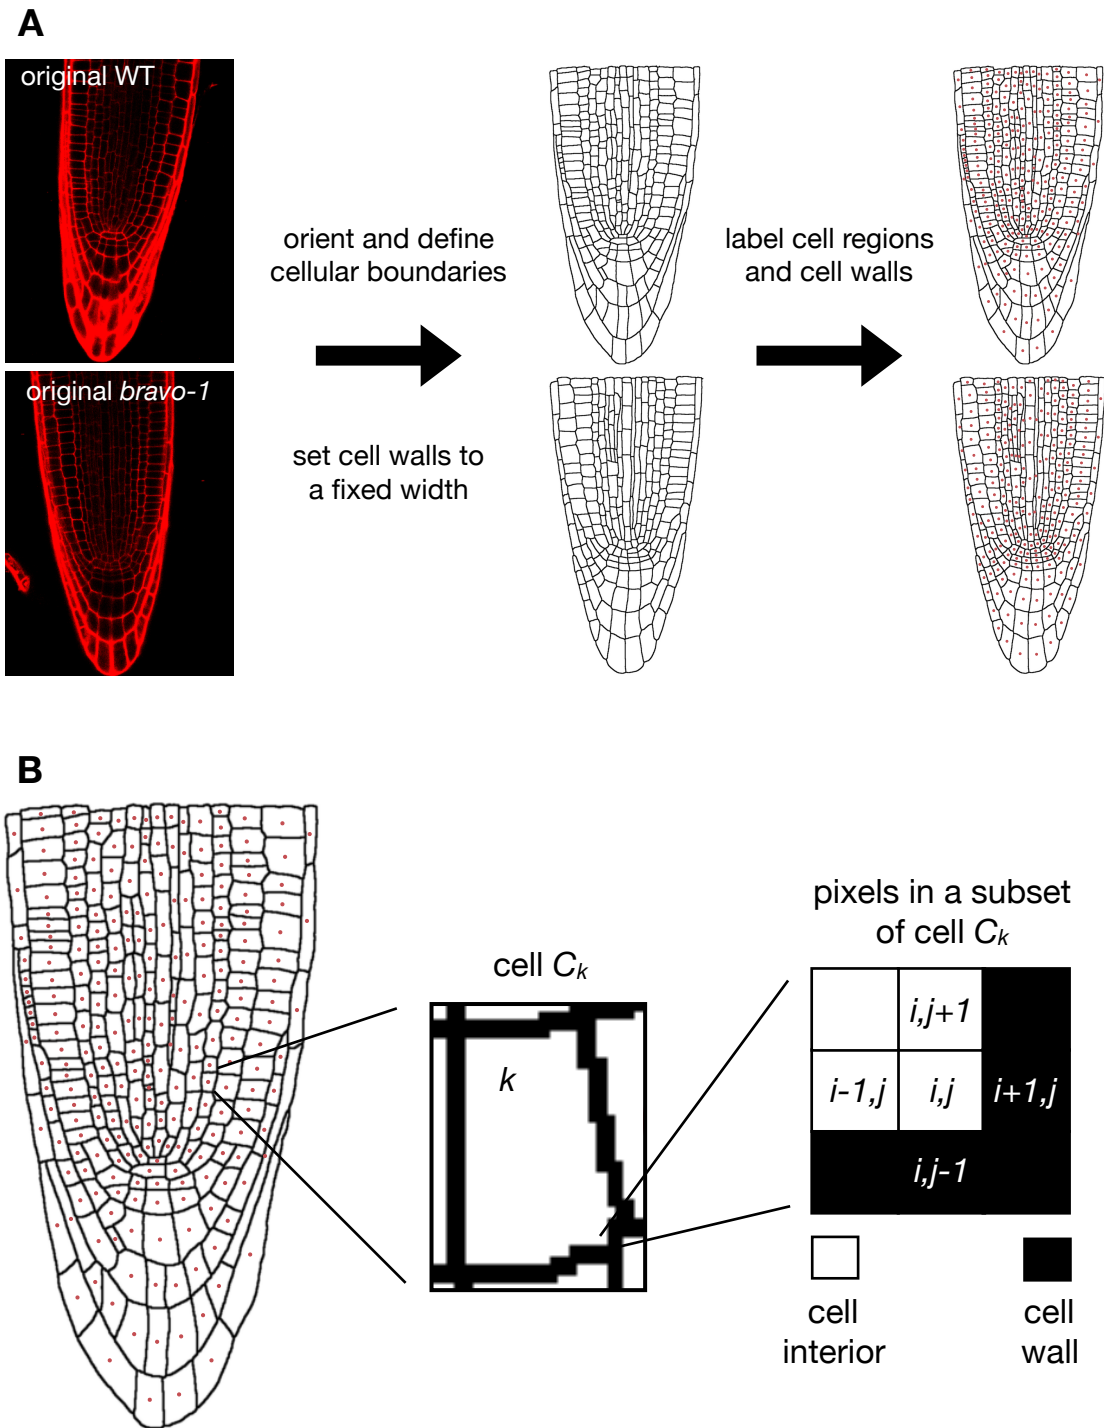

**Figure 10: Supp. Fig. 5. Construction of a realistic root layout.** **A)** We select two root tips, representative for WT and *bravo-2* mutants, from a confocal image of the root where cell walls are PI-stained (red). We first orient and re-scale the roots so that both can be compared. As a result proportions are slightly modified from the original image. This initial step is optional. We then reset a fixed width for the cell walls (2 pixels in the simulation). Subsequently, we label the images to define each cellular region (marked as red dots located at the centroid of each cell). **B)** Cell  $C_k$  is the cell that contains the pixels with label  $k$  (which define the cell's interior, white). It is surrounded by pixels corresponding to cell walls (black). The spatial position of a pixel is denoted by two indexes,  $i$  and  $j$ . On this discretized grid we implement the corresponding reaction-diffusion equations.

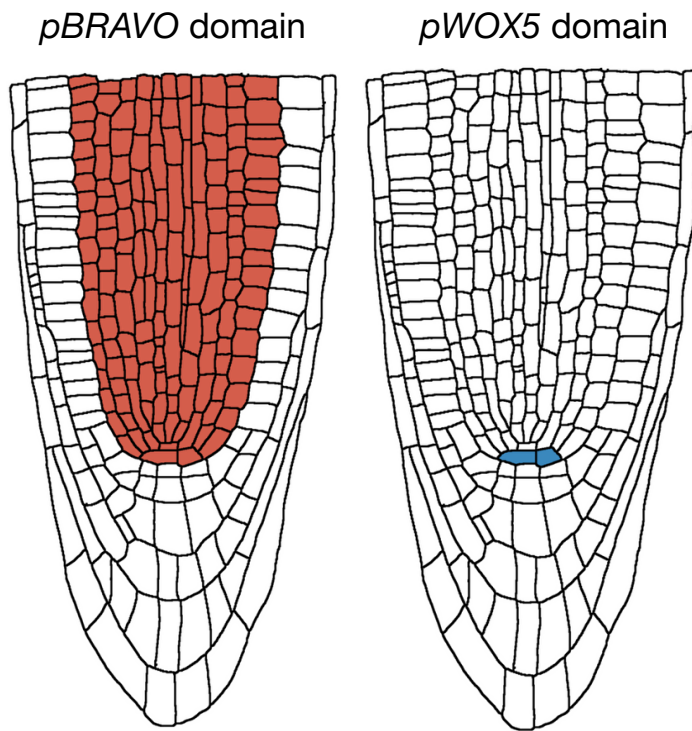

**Figure 11: Supp. Fig. 6. Cellular domains where production of BRAVO and WOX5 is enabled in the simulations.** The production terms of BRAVO and WOX5 are restricted to the red and blue domains respectively (these regions are denoted as the pBRAVO and pWOX5 domains, since they indicate where the promoter of BRAVO and WOX5 can have an activity). The GFP reporters of their promoters are produced only in these same domains. In this way, we only allow  $B$  and  $B_{GFP}$  to be activated by  $Z$  in the QC, vasculature, cortex and endodermis, while  $W$  and  $W_{GFP}$  are only produced at the QC. This does not prevent WOX5 and GFP proteins to be present in other tissues, which they can reach through diffusion.

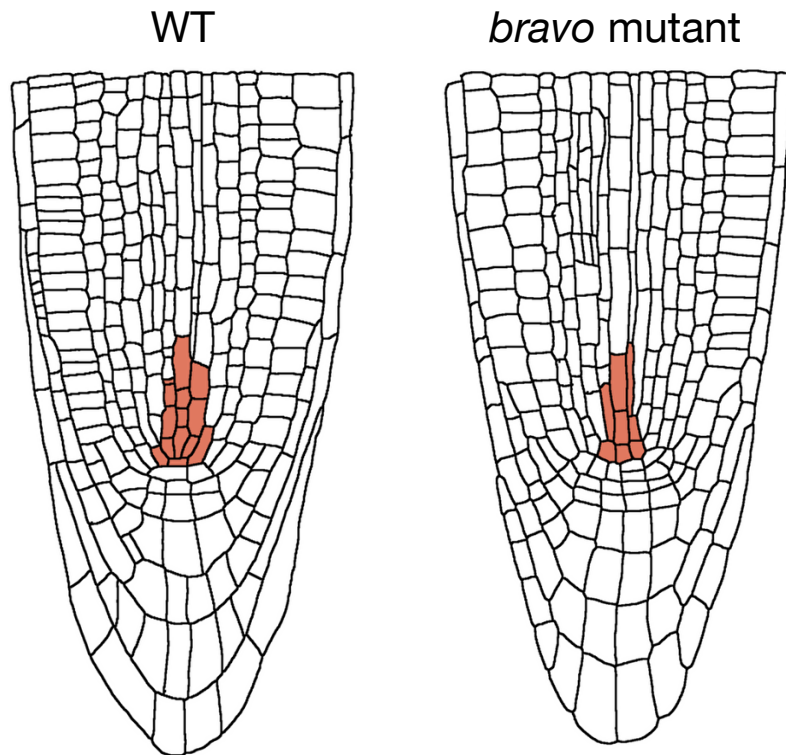

**Figure 12: Supp. Fig. 7. Domains of basal production of BRAVO.** In the simulations using realistic root layouts, BRAVO is assumed to have basal levels of production only in those first cells of the vasculature colored in red. This consideration comes from the fact that in double *bravo wox5* mutants, basal expression of *pBRAVO:GFP* can still be observed [28], with a spatial pattern similar to the one shown in red in the figure. The GFP reporter of BRAVO promoter is set also to have a basal activity in the red domains only. Since WT and *bravo* mutant roots differ in morphology, the specific cells that are set to have basal BRAVO production are slightly different in each root, as depicted.

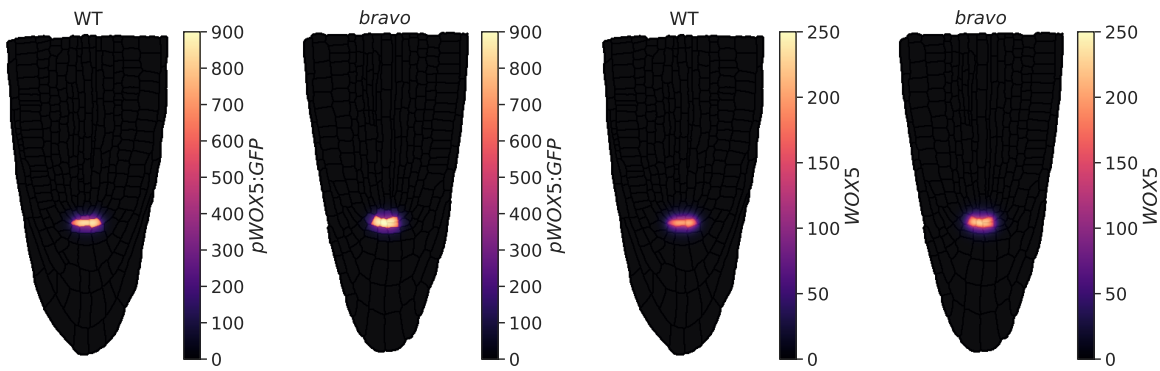

**Figure 13: Supp. Fig. 8. Concentration of  $pWOX5:GFP$  ( $W_{GFP}$ ) and  $WOX5$  ( $W$ ) in the absence of other regulatory factors.** Stationary patterns in the WT and in the *bravo* mutant when  $WOX5$  is produced only at the QC, degrades and diffuses as in the Mixed Model, and no other molecule (e.g. BRAVO) is present. The model used is detailed in SI Text. All parameter values of  $WOX5$  dynamics as in Figure 5. This  $WOX5$  diffusion coefficient allows  $WOX5$  to reach only with visible concentration the cells adjacent to the QC. Concentrations shown in this figure are obtained by running the simulations up to a time  $t = 3000$  a.u., at which the stationary state is already reached.

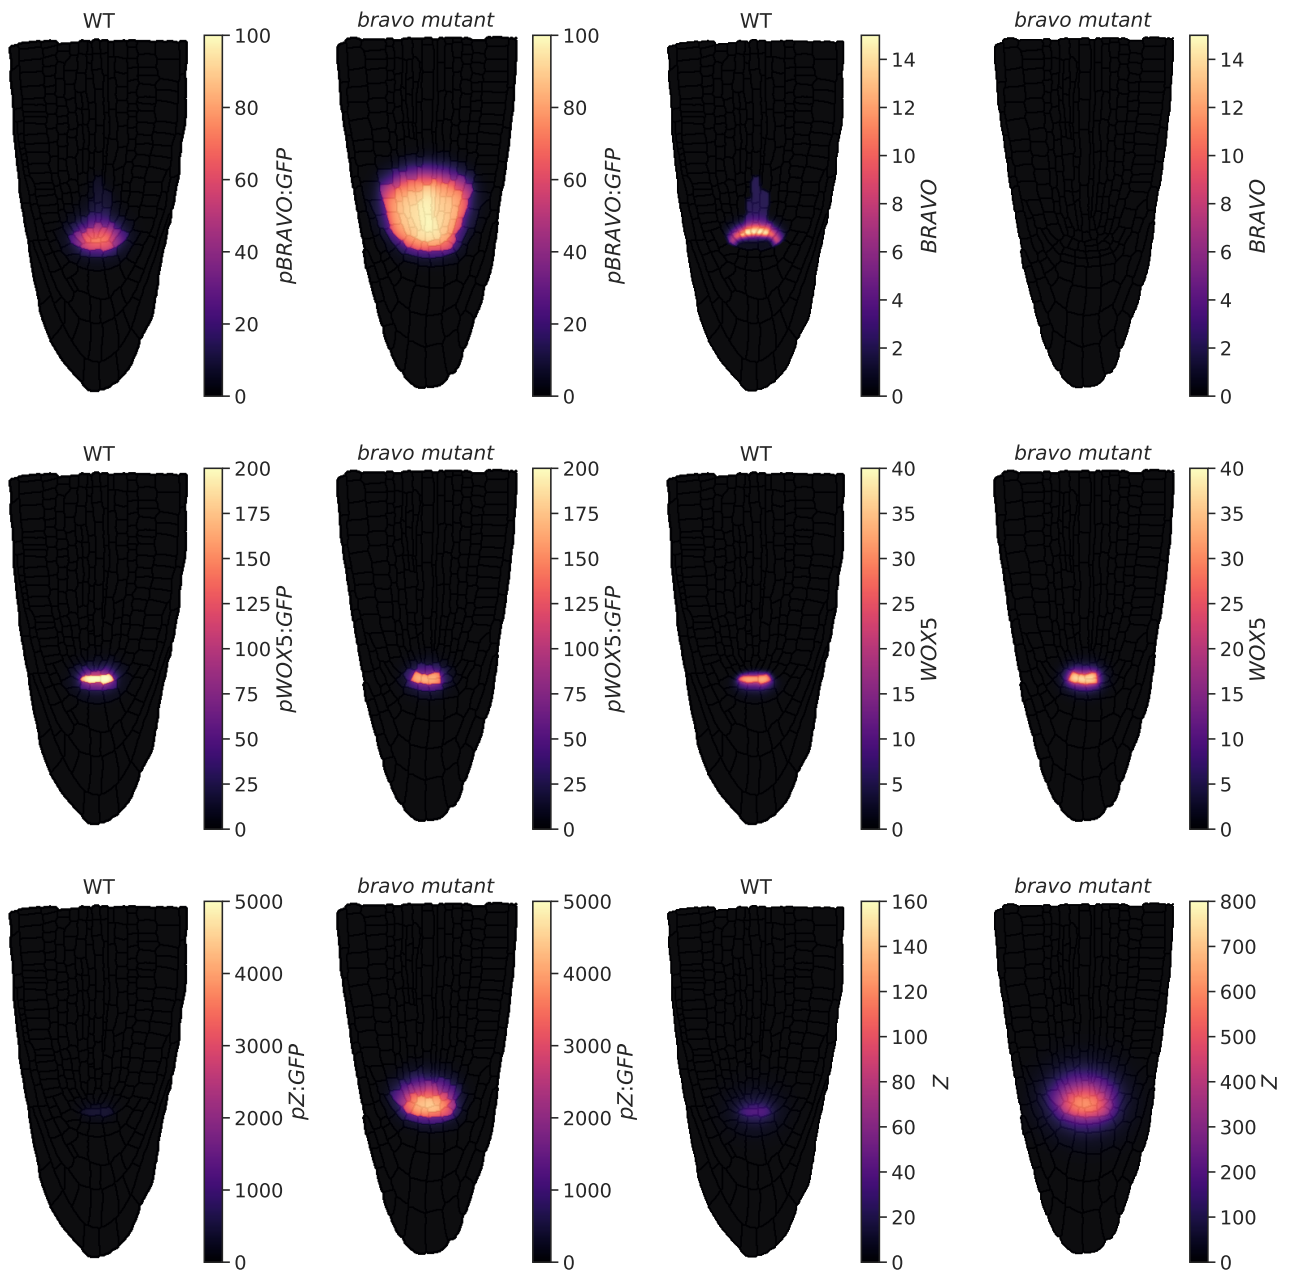

**Figure 14: Supp. Fig. 9. Stationary profiles of all proteins and GFP reporters of promoters corresponding to the case of Figure 5A (Mixed Model).** The results are shown for the WT and the *bravo* mutant. The first two panels correspond to the same results shown in Figure 5A.

808 **Supplementary Tables**

| Parameter     | Description                            | IS    | AS    | R     |
|---------------|----------------------------------------|-------|-------|-------|
| $\alpha$      | Protein production rate of BRAVO       | 0.01  | 0.01  | 0.01  |
| $\gamma_{QC}$ | Protein production rate of WOX5        | 5     | 5     | 5     |
| $\beta$       | Protein production rate of X           | –     | 0.01  | 0.01  |
| $c$           | Threshold of Z repression by BRAVO     | –     | –     | 0.01  |
| $\lambda$     | Binding rate between BRAVO and WOX5    | 0.001 | 0.001 | 0.001 |
| $d_B$         | Degradation rate of BRAVO proteins     | 0.01  | 0.01  | 0.01  |
| $d_W$         | Degradation rate of WOX5 proteins      | 0.01  | 0.01  | 0.01  |
| $d_X$         | Degradation rate of X proteins         | –     | 0.01  | –     |
| $d_Z$         | Degradation rate of Z proteins         | –     | –     | 0.01  |
| $D_W$         | Diffusion coefficient of WOX5 proteins | 0.01  | –     | –     |
| $D_X$         | Diffusion coefficient of X proteins    | –     | 0.01  | –     |
| $D_Z$         | Diffusion coefficient of Z proteins    | –     | –     | 0.01  |

**Table 1: Default parameters of the immobilization by sequestration (IS), attenuation by sequestration (AS) and repression (R) models.** All parameter values are indicated in arbitrary units.

| Parameter      | Description                                | ISAS  |
|----------------|--------------------------------------------|-------|
| $\alpha_S$     | Protein production rate of S               | 0.1   |
| $d_S$          | Degradation rate of S proteins             | 0.01  |
| $\lambda_{BS}$ | Complex formation rate between BRAVO and S | 0.001 |
| $\lambda_{WS}$ | Complex formation rate between WOX5 and S  | 0.001 |

**Table 2: Additional parameters for the immobilization by sequestration model with an additional sequesteror (ISAS).** The remaining parameters are the same as in the original immobilization by sequestration model. All parameter values are indicated in arbitrary units.

| <b>Parameter</b> | <b>Description</b>                                      | <b>Value (a.u.)</b> |
|------------------|---------------------------------------------------------|---------------------|
| $\alpha_0$       | Basal production rate of BRAVO proteins                 | 0.01                |
| $\alpha$         | Regulated production rate of BRAVO proteins             | 0.1                 |
| $\gamma_{QC}$    | Production rate of WOX5 proteins                        | 2                   |
| $\beta$          | Production rate of Z proteins                           | 6                   |
| $k_B$            | Threshold of BRAVO activation by Z                      | 10                  |
| $k_Z$            | Threshold of Z activation by WOX5                       | 1                   |
| $k_W$            | Threshold of WOX5 self-repression                       | 20                  |
| $c$              | Threshold of Z repression by BRAVO                      | 10                  |
| $\lambda$        | Binding rate between BRAVO and WOX5                     | 0.005               |
| $d_B$            | Degradation rate of BRAVO proteins                      | 0.005               |
| $d_W$            | Degradation rate of WOX5 proteins                       | 0.005               |
| $d_Z$            | Degradation rate of Z proteins                          | 0.005               |
| $D_W^{cyt}$      | Diffusion coefficient of WOX5 proteins in the cytoplasm | 0.2                 |
| $D_W^{wall}$     | Diffusion coefficient of WOX5 proteins in cell walls    | 0.1                 |
| $D_Z^{cyt}$      | Diffusion coefficient of Z proteins in the cytoplasm    | 1.2                 |
| $D_Z^{wall}$     | Diffusion coefficient of Z proteins in cell walls       | 0.5                 |
| $D_{GFP}^{cyt}$  | Diffusion coefficient of GFP proteins in the cytoplasm  | 0.1                 |
| $D_{GFP}^{wall}$ | Diffusion coefficient of GFP proteins in cell walls     | 0.01                |
| $d_{GFP}$        | Degradation rate of GFP proteins                        | 0.001               |

**Table 3: Default parameters of the mixed model in the realistic root layout.** All parameter values are indicated in arbitrary units of concentration, time and space.
